# Supplementary material for: Multiomics Data Collection, Visualization, and Utilization for Guiding Metabolic Engineering
Source: Frontiers journal article supplement (doi:10.3389/fbioe.2021.612893), 2021-02-09
Supplement: Data_Sheet_1.ZIP [file Data_Sheet_1.ZIP]

## Sheet: Limonene_data_for_ART - dashes 
Study ID	Study Name	Line Name	Line Description	Strain(s)	Media	Starting OD	Protocol Name	Assay ID	Assay Name	Type	Measurement Updated	X Units	Y Units	24
54255	Limonene data for ART	B.Mm	DH1 with single plasmid (medium-copy) expression system for production of Limonene		EZrich (Teknova) 1% Glucose	1.2	OD600	55297	B.Mm	Optical Density	2018-09-26 21:46:11.720910+00:00	hours		5.31867
54255	Limonene data for ART	A.Ml	DH1 with single plasmid (high-copy) expression system for production of Limonene		EZrich (Teknova) 1% Glucose	1.2	OD600	55298	A.Ml	Optical Density	2018-09-26 21:46:11.720910+00:00	hours		4.886
54255	Limonene data for ART	BL.Mm	DH1 with two plasmid (B + high with extra copy of LS) expression system for production of Limonene		EZrich (Teknova) 1% Glucose	1.2	OD600	55299	BL.Mm	Optical Density	2018-09-26 21:46:11.720910+00:00	hours		4.4
54255	Limonene data for ART	A.Mh	DH1 with single plasmid (high-copy) expression system for production of Limonene		EZrich (Teknova) 1% Glucose	1.2	OD600	55300	A.Mh	Optical Density	2018-09-26 21:46:11.720910+00:00	hours		5.29333
54255	Limonene data for ART	A.Hl	DH1 with single plasmid (high-copy) expression system for production of Limonene		EZrich (Teknova) 1% Glucose	2.5	OD600	55301	A.Hl	Optical Density	2018-09-26 21:46:11.720910+00:00	hours		5.03733
54255	Limonene data for ART	2X.Hh	DH1 with two plasmid (medium + high copy) expression system for production of Limonene		EZrich (Teknova) 1% Glucose	2.5	OD600	55302	2X.Hh	Optical Density	2018-09-26 21:46:11.720910+00:00	hours		4.18
54255	Limonene data for ART	B.Mh	DH1 with single plasmid (medium-copy) expression system for production of Limonene		EZrich (Teknova) 1% Glucose	1.2	OD600	55303	B.Mh	Optical Density	2018-09-26 21:46:11.720910+00:00	hours		5.21
54255	Limonene data for ART	B.Hl	DH1 with single plasmid (medium-copy) expression system for production of Limonene		EZrich (Teknova) 1% Glucose	2.5	OD600	55304	B.Hl	Optical Density	2018-09-26 21:46:11.720910+00:00	hours		3.89067
54255	Limonene data for ART	B.Hm	DH1 with single plasmid (medium-copy) expression system for production of Limonene		EZrich (Teknova) 1% Glucose	2.5	OD600	55305	B.Hm	Optical Density	2018-09-26 21:46:11.720910+00:00	hours		4.03733
54255	Limonene data for ART	B.Hh	DH1 with single plasmid (medium-copy) expression system for production of Limonene		EZrich (Teknova) 1% Glucose	2.5	OD600	55306	B.Hh	Optical Density	2018-09-26 21:46:11.720910+00:00	hours		4.248
54255	Limonene data for ART	A.Hm	DH1 with single plasmid (high-copy) expression system for production of Limonene		EZrich (Teknova) 1% Glucose	2.5	OD600	55307	A.Hm	Optical Density	2018-09-26 21:46:11.720910+00:00	hours		4.81667
54255	Limonene data for ART	A.Hh	DH1 with single plasmid (high-copy) expression system for production of Limonene		EZrich (Teknova) 1% Glucose	2.5	OD600	55308	A.Hh	Optical Density	2018-09-26 21:46:11.720910+00:00	hours		4.69667
54255	Limonene data for ART	A.Mm	DH1 with single plasmid (high-copy) expression system for production of Limonene		EZrich (Teknova) 1% Glucose	1.2	OD600	55309	A.Mm	Optical Density	2018-09-26 21:46:11.720910+00:00	hours		4.95867
54255	Limonene data for ART	BL.Mh	DH1 with two plasmid (B + high with extra copy of LS) expression system for production of Limonene		EZrich (Teknova) 1% Glucose	1.2	OD600	55310	BL.Mh	Optical Density	2018-09-26 21:46:11.720910+00:00	hours		4.10533
54255	Limonene data for ART	A.Ll	DH1 with single plasmid (high-copy) expression system for production of Limonene		EZrich (Teknova) 1% Glucose	0.2	OD600	55311	A.Ll	Optical Density	2018-09-26 21:46:11.720910+00:00	hours		4.90733
54255	Limonene data for ART	2X.Hm	DH1 with two plasmid (medium + high copy) expression system for production of Limonene		EZrich (Teknova) 1% Glucose	2.5	OD600	55312	2X.Hm	Optical Density	2018-09-26 21:46:11.720910+00:00	hours		4.40867
54255	Limonene data for ART	2X.Ll	DH1 with two plasmid (medium + high copy) expression system for production of Limonene		EZrich (Teknova) 1% Glucose	0.2	OD600	55313	2X.Ll	Optical Density	2018-09-26 21:46:11.720910+00:00	hours		6.362
54255	Limonene data for ART	2X.Lm	DH1 with two plasmid (medium + high copy) expression system for production of Limonene		EZrich (Teknova) 1% Glucose	0.2	OD600	55314	2X.Lm	Optical Density	2018-09-26 21:46:11.720910+00:00	hours		4.87267
54255	Limonene data for ART	2X.Lh	DH1 with two plasmid (medium + high copy) expression system for production of Limonene		EZrich (Teknova) 1% Glucose	0.2	OD600	55315	2X.Lh	Optical Density	2018-09-26 21:46:11.720910+00:00	hours		4.96467
54255	Limonene data for ART	2X.Ml	DH1 with two plasmid (medium + high copy) expression system for production of Limonene		EZrich (Teknova) 1% Glucose	1.2	OD600	55316	2X.Ml	Optical Density	2018-09-26 21:46:11.720910+00:00	hours		5.93
54255	Limonene data for ART	2X.Mm	DH1 with two plasmid (medium + high copy) expression system for production of Limonene		EZrich (Teknova) 1% Glucose	1.2	OD600	55317	2X.Mm	Optical Density	2018-09-26 21:46:11.720910+00:00	hours		4.316
54255	Limonene data for ART	A.Lm	DH1 with single plasmid (high-copy) expression system for production of Limonene		EZrich (Teknova) 1% Glucose	0.2	OD600	55318	A.Lm	Optical Density	2018-09-26 21:46:11.720910+00:00	hours		6.112
54255	Limonene data for ART	A.Lh	DH1 with single plasmid (high-copy) expression system for production of Limonene		EZrich (Teknova) 1% Glucose	0.2	OD600	55319	A.Lh	Optical Density	2018-09-26 21:46:11.720910+00:00	hours		5.778
54255	Limonene data for ART	BL.Ml	DH1 with two plasmid (B + high with extra copy of LS) expression system for production of Limonene		EZrich (Teknova) 1% Glucose	1.2	OD600	55320	BL.Ml	Optical Density	2018-09-26 21:46:11.720910+00:00	hours		4.46267
54255	Limonene data for ART	B.Ll	DH1 with single plasmid (medium-copy) expression system for production of Limonene		EZrich (Teknova) 1% Glucose	0.2	OD600	55321	B.Ll	Optical Density	2018-09-26 21:46:11.720910+00:00	hours		4.14333
54255	Limonene data for ART	B.Lm	DH1 with single plasmid (medium-copy) expression system for production of Limonene		EZrich (Teknova) 1% Glucose	0.2	OD600	55322	B.Lm	Optical Density	2018-09-26 21:46:11.720910+00:00	hours		6.20333
54255	Limonene data for ART	2X.Hl	DH1 with two plasmid (medium + high copy) expression system for production of Limonene		EZrich (Teknova) 1% Glucose	2.5	OD600	55323	2X.Hl	Optical Density	2018-09-26 21:46:11.720910+00:00	hours		5.866
54255	Limonene data for ART	2X.Mh	DH1 with two plasmid (medium + high copy) expression system for production of Limonene		EZrich (Teknova) 1% Glucose	1.2	OD600	55324	2X.Mh	Optical Density	2018-09-26 21:46:11.720910+00:00	hours		4.192
54255	Limonene data for ART	B.Lh	DH1 with single plasmid (medium-copy) expression system for production of Limonene		EZrich (Teknova) 1% Glucose	0.2	OD600	55325	B.Lh	Optical Density	2018-09-26 21:46:11.720910+00:00	hours		5.69467
54255	Limonene data for ART	B.Ml	DH1 with single plasmid (medium-copy) expression system for production of Limonene		EZrich (Teknova) 1% Glucose	1.2	OD600	55326	B.Ml	Optical Density	2018-09-26 21:46:11.720910+00:00	hours		4.17733
54255	Limonene data for ART	2X.Mh	DH1 with two plasmid (medium + high copy) expression system for production of Limonene		EZrich (Teknova) 1% Glucose	1.2	GC-MS	55267	2X.Mh	4-isopropenyl-1-methyl-cyclohexene	2018-09-26 21:36:49.827085+00:00	hours	mg/L	75.3926
54255	Limonene data for ART	B.Lm	DH1 with single plasmid (medium-copy) expression system for production of Limonene		EZrich (Teknova) 1% Glucose	0.2	GC-MS	55268	B.Lm	4-isopropenyl-1-methyl-cyclohexene	2018-09-26 21:36:49.827085+00:00	hours	mg/L	12.7579
54255	Limonene data for ART	BL.Mm	DH1 with two plasmid (B + high with extra copy of LS) expression system for production of Limonene		EZrich (Teknova) 1% Glucose	1.2	GC-MS	55269	BL.Mm	4-isopropenyl-1-methyl-cyclohexene	2018-09-26 21:36:49.827085+00:00	hours	mg/L	119.814
54255	Limonene data for ART	2X.Ll	DH1 with two plasmid (medium + high copy) expression system for production of Limonene		EZrich (Teknova) 1% Glucose	0.2	GC-MS	55270	2X.Ll	4-isopropenyl-1-methyl-cyclohexene	2018-09-26 21:36:49.827085+00:00	hours	mg/L	5.98466
54255	Limonene data for ART	A.Mm	DH1 with single plasmid (high-copy) expression system for production of Limonene		EZrich (Teknova) 1% Glucose	1.2	GC-MS	55271	A.Mm	4-isopropenyl-1-methyl-cyclohexene	2018-09-26 21:36:49.827085+00:00	hours	mg/L	9.66957
54255	Limonene data for ART	B.Ll	DH1 with single plasmid (medium-copy) expression system for production of Limonene		EZrich (Teknova) 1% Glucose	0.2	GC-MS	55272	B.Ll	4-isopropenyl-1-methyl-cyclohexene	2018-09-26 21:36:49.827085+00:00	hours	mg/L	58.5378
54255	Limonene data for ART	A.Mh	DH1 with single plasmid (high-copy) expression system for production of Limonene		EZrich (Teknova) 1% Glucose	1.2	GC-MS	55273	A.Mh	4-isopropenyl-1-methyl-cyclohexene	2018-09-26 21:36:49.827085+00:00	hours	mg/L	7.9894
54255	Limonene data for ART	2X.Lm	DH1 with two plasmid (medium + high copy) expression system for production of Limonene		EZrich (Teknova) 1% Glucose	0.2	GC-MS	55274	2X.Lm	4-isopropenyl-1-methyl-cyclohexene	2018-09-26 21:36:49.827085+00:00	hours	mg/L	56.9713
54255	Limonene data for ART	A.Hl	DH1 with single plasmid (high-copy) expression system for production of Limonene		EZrich (Teknova) 1% Glucose	2.5	GC-MS	55275	A.Hl	4-isopropenyl-1-methyl-cyclohexene	2018-09-26 21:36:49.827085+00:00	hours	mg/L	18.1629
54255	Limonene data for ART	2X.Hh	DH1 with two plasmid (medium + high copy) expression system for production of Limonene		EZrich (Teknova) 1% Glucose	2.5	GC-MS	55276	2X.Hh	4-isopropenyl-1-methyl-cyclohexene	2018-09-26 21:36:49.827085+00:00	hours	mg/L	71.0543
54255	Limonene data for ART	B.Ml	DH1 with single plasmid (medium-copy) expression system for production of Limonene		EZrich (Teknova) 1% Glucose	1.2	GC-MS	55277	B.Ml	4-isopropenyl-1-methyl-cyclohexene	2018-09-26 21:36:49.827085+00:00	hours	mg/L	104.537
54255	Limonene data for ART	B.Mm	DH1 with single plasmid (medium-copy) expression system for production of Limonene		EZrich (Teknova) 1% Glucose	1.2	GC-MS	55278	B.Mm	4-isopropenyl-1-methyl-cyclohexene	2018-09-26 21:36:49.827085+00:00	hours	mg/L	35.2998
54255	Limonene data for ART	2X.Lh	DH1 with two plasmid (medium + high copy) expression system for production of Limonene		EZrich (Teknova) 1% Glucose	0.2	GC-MS	55279	2X.Lh	4-isopropenyl-1-methyl-cyclohexene	2018-09-26 21:36:49.827085+00:00	hours	mg/L	53.6031
54255	Limonene data for ART	B.Mh	DH1 with single plasmid (medium-copy) expression system for production of Limonene		EZrich (Teknova) 1% Glucose	1.2	GC-MS	55280	B.Mh	4-isopropenyl-1-methyl-cyclohexene	2018-09-26 21:36:49.827085+00:00	hours	mg/L	31.6138
54255	Limonene data for ART	2X.Hl	DH1 with two plasmid (medium + high copy) expression system for production of Limonene		EZrich (Teknova) 1% Glucose	2.5	GC-MS	55281	2X.Hl	4-isopropenyl-1-methyl-cyclohexene	2018-09-26 21:36:49.827085+00:00	hours	mg/L	2.46049
54255	Limonene data for ART	B.Hl	DH1 with single plasmid (medium-copy) expression system for production of Limonene		EZrich (Teknova) 1% Glucose	2.5	GC-MS	55282	B.Hl	4-isopropenyl-1-methyl-cyclohexene	2018-09-26 21:36:49.827085+00:00	hours	mg/L	5.11461
54255	Limonene data for ART	2X.Ml	DH1 with two plasmid (medium + high copy) expression system for production of Limonene		EZrich (Teknova) 1% Glucose	1.2	GC-MS	55283	2X.Ml	4-isopropenyl-1-methyl-cyclohexene	2018-09-26 21:36:49.827085+00:00	hours	mg/L	5.17895
54255	Limonene data for ART	B.Hm	DH1 with single plasmid (medium-copy) expression system for production of Limonene		EZrich (Teknova) 1% Glucose	2.5	GC-MS	55284	B.Hm	4-isopropenyl-1-methyl-cyclohexene	2018-09-26 21:36:49.827085+00:00	hours	mg/L	21.9326
54255	Limonene data for ART	B.Lh	DH1 with single plasmid (medium-copy) expression system for production of Limonene		EZrich (Teknova) 1% Glucose	0.2	GC-MS	55285	B.Lh	4-isopropenyl-1-methyl-cyclohexene	2018-09-26 21:36:49.827085+00:00	hours	mg/L	10.6862
54255	Limonene data for ART	B.Hh	DH1 with single plasmid (medium-copy) expression system for production of Limonene		EZrich (Teknova) 1% Glucose	2.5	GC-MS	55286	B.Hh	4-isopropenyl-1-methyl-cyclohexene	2018-09-26 21:36:49.827085+00:00	hours	mg/L	26.4628
54255	Limonene data for ART	A.Ll	DH1 with single plasmid (high-copy) expression system for production of Limonene		EZrich (Teknova) 1% Glucose	0.2	GC-MS	55287	A.Ll	4-isopropenyl-1-methyl-cyclohexene	2018-09-26 21:36:49.827085+00:00	hours	mg/L	15.2346
54255	Limonene data for ART	A.Hm	DH1 with single plasmid (high-copy) expression system for production of Limonene		EZrich (Teknova) 1% Glucose	2.5	GC-MS	55288	A.Hm	4-isopropenyl-1-methyl-cyclohexene	2018-09-26 21:36:49.827085+00:00	hours	mg/L	19.7211
54255	Limonene data for ART	2X.Mm	DH1 with two plasmid (medium + high copy) expression system for production of Limonene		EZrich (Teknova) 1% Glucose	1.2	GC-MS	55289	2X.Mm	4-isopropenyl-1-methyl-cyclohexene	2018-09-26 21:36:49.827085+00:00	hours	mg/L	101.205
54255	Limonene data for ART	A.Hh	DH1 with single plasmid (high-copy) expression system for production of Limonene		EZrich (Teknova) 1% Glucose	2.5	GC-MS	55290	A.Hh	4-isopropenyl-1-methyl-cyclohexene	2018-09-26 21:36:49.827085+00:00	hours	mg/L	19.5082
54255	Limonene data for ART	A.Ml	DH1 with single plasmid (high-copy) expression system for production of Limonene		EZrich (Teknova) 1% Glucose	1.2	GC-MS	55291	A.Ml	4-isopropenyl-1-methyl-cyclohexene	2018-09-26 21:36:49.827085+00:00	hours	mg/L	15.3366
54255	Limonene data for ART	A.Lm	DH1 with single plasmid (high-copy) expression system for production of Limonene		EZrich (Teknova) 1% Glucose	0.2	GC-MS	55292	A.Lm	4-isopropenyl-1-methyl-cyclohexene	2018-09-26 21:36:49.827085+00:00	hours	mg/L	2.53969
54255	Limonene data for ART	BL.Mh	DH1 with two plasmid (B + high with extra copy of LS) expression system for production of Limonene		EZrich (Teknova) 1% Glucose	1.2	GC-MS	55293	BL.Mh	4-isopropenyl-1-methyl-cyclohexene	2018-09-26 21:36:49.827085+00:00	hours	mg/L	127.995
54255	Limonene data for ART	A.Lh	DH1 with single plasmid (high-copy) expression system for production of Limonene		EZrich (Teknova) 1% Glucose	0.2	GC-MS	55294	A.Lh	4-isopropenyl-1-methyl-cyclohexene	2018-09-26 21:36:49.827085+00:00	hours	mg/L	1.65513
54255	Limonene data for ART	BL.Ml	DH1 with two plasmid (B + high with extra copy of LS) expression system for production of Limonene		EZrich (Teknova) 1% Glucose	1.2	GC-MS	55295	BL.Ml	4-isopropenyl-1-methyl-cyclohexene	2018-09-26 21:36:49.827085+00:00	hours	mg/L	6.72018
54255	Limonene data for ART	2X.Hm	DH1 with two plasmid (medium + high copy) expression system for production of Limonene		EZrich (Teknova) 1% Glucose	2.5	GC-MS	55296	2X.Hm	4-isopropenyl-1-methyl-cyclohexene	2018-09-26 21:36:49.827085+00:00	hours	mg/L	52.1312
54255	Limonene data for ART	B.Mh	DH1 with single plasmid (medium-copy) expression system for production of Limonene		EZrich (Teknova) 1% Glucose	1.2	Targeted Proteomics	55327	B.Mh	MVD1_YEAST	2018-09-27 01:08:51.522093+00:00	hours		1.7944
54255	Limonene data for ART	B.Mh	DH1 with single plasmid (medium-copy) expression system for production of Limonene		EZrich (Teknova) 1% Glucose	1.2	Targeted Proteomics	55327	B.Mh	Q40322_MENSP	2018-09-27 01:08:51.522093+00:00	hours		5.0071
54255	Limonene data for ART	B.Mh	DH1 with single plasmid (medium-copy) expression system for production of Limonene		EZrich (Teknova) 1% Glucose	1.2	Targeted Proteomics	55327	B.Mh	IDI_ECOLI	2018-09-27 01:08:51.522093+00:00	hours		1.7301
54255	Limonene data for ART	B.Mh	DH1 with single plasmid (medium-copy) expression system for production of Limonene		EZrich (Teknova) 1% Glucose	1.2	Targeted Proteomics	55327	B.Mh	ATOB_ECOLI	2018-09-27 01:08:51.522093+00:00	hours		0.6159
54255	Limonene data for ART	B.Mh	DH1 with single plasmid (medium-copy) expression system for production of Limonene		EZrich (Teknova) 1% Glucose	1.2	Targeted Proteomics	55327	B.Mh	Q8LKJ3_ABIGR	2018-09-27 01:08:51.522093+00:00	hours		0.1409
54255	Limonene data for ART	B.Mh	DH1 with single plasmid (medium-copy) expression system for production of Limonene		EZrich (Teknova) 1% Glucose	1.2	Targeted Proteomics	55327	B.Mh	Q9FD87_STAAU	2018-09-27 01:08:51.522093+00:00	hours		1.9505
54255	Limonene data for ART	B.Mh	DH1 with single plasmid (medium-copy) expression system for production of Limonene		EZrich (Teknova) 1% Glucose	1.2	Targeted Proteomics	55327	B.Mh	Q9FD86_STAAU	2018-09-27 01:08:51.522093+00:00	hours		1.4415
54255	Limonene data for ART	B.Mh	DH1 with single plasmid (medium-copy) expression system for production of Limonene		EZrich (Teknova) 1% Glucose	1.2	Targeted Proteomics	55327	B.Mh	KIME_YEAST	2018-09-27 01:08:51.522093+00:00	hours		0.3235
54255	Limonene data for ART	B.Mh	DH1 with single plasmid (medium-copy) expression system for production of Limonene		EZrich (Teknova) 1% Glucose	1.2	Targeted Proteomics	55327	B.Mh	ERG8_YEAST	2018-09-27 01:08:51.522093+00:00	hours		0.9816
54255	Limonene data for ART	B.Ml	DH1 with single plasmid (medium-copy) expression system for production of Limonene		EZrich (Teknova) 1% Glucose	1.2	Targeted Proteomics	55328	B.Ml	MVD1_YEAST	2018-09-27 01:08:51.522093+00:00	hours		1.129
54255	Limonene data for ART	B.Ml	DH1 with single plasmid (medium-copy) expression system for production of Limonene		EZrich (Teknova) 1% Glucose	1.2	Targeted Proteomics	55328	B.Ml	Q40322_MENSP	2018-09-27 01:08:51.522093+00:00	hours		4.5317
54255	Limonene data for ART	B.Ml	DH1 with single plasmid (medium-copy) expression system for production of Limonene		EZrich (Teknova) 1% Glucose	1.2	Targeted Proteomics	55328	B.Ml	IDI_ECOLI	2018-09-27 01:08:51.522093+00:00	hours		1.8527
54255	Limonene data for ART	B.Ml	DH1 with single plasmid (medium-copy) expression system for production of Limonene		EZrich (Teknova) 1% Glucose	1.2	Targeted Proteomics	55328	B.Ml	ATOB_ECOLI	2018-09-27 01:08:51.522093+00:00	hours		0.1654
54255	Limonene data for ART	B.Ml	DH1 with single plasmid (medium-copy) expression system for production of Limonene		EZrich (Teknova) 1% Glucose	1.2	Targeted Proteomics	55328	B.Ml	Q8LKJ3_ABIGR	2018-09-27 01:08:51.522093+00:00	hours		0.8922
54255	Limonene data for ART	B.Ml	DH1 with single plasmid (medium-copy) expression system for production of Limonene		EZrich (Teknova) 1% Glucose	1.2	Targeted Proteomics	55328	B.Ml	Q9FD87_STAAU	2018-09-27 01:08:51.522093+00:00	hours		0.3756
54255	Limonene data for ART	B.Ml	DH1 with single plasmid (medium-copy) expression system for production of Limonene		EZrich (Teknova) 1% Glucose	1.2	Targeted Proteomics	55328	B.Ml	Q9FD86_STAAU	2018-09-27 01:08:51.522093+00:00	hours		0.2786
54255	Limonene data for ART	B.Ml	DH1 with single plasmid (medium-copy) expression system for production of Limonene		EZrich (Teknova) 1% Glucose	1.2	Targeted Proteomics	55328	B.Ml	KIME_YEAST	2018-09-27 01:08:51.522093+00:00	hours		0.2555
54255	Limonene data for ART	B.Ml	DH1 with single plasmid (medium-copy) expression system for production of Limonene		EZrich (Teknova) 1% Glucose	1.2	Targeted Proteomics	55328	B.Ml	ERG8_YEAST	2018-09-27 01:08:51.522093+00:00	hours		0.4407
54255	Limonene data for ART	B.Mm	DH1 with single plasmid (medium-copy) expression system for production of Limonene		EZrich (Teknova) 1% Glucose	1.2	Targeted Proteomics	55329	B.Mm	MVD1_YEAST	2018-09-27 01:08:51.522093+00:00	hours		1.5997
54255	Limonene data for ART	B.Mm	DH1 with single plasmid (medium-copy) expression system for production of Limonene		EZrich (Teknova) 1% Glucose	1.2	Targeted Proteomics	55329	B.Mm	Q40322_MENSP	2018-09-27 01:08:51.522093+00:00	hours		5.5903
54255	Limonene data for ART	B.Mm	DH1 with single plasmid (medium-copy) expression system for production of Limonene		EZrich (Teknova) 1% Glucose	1.2	Targeted Proteomics	55329	B.Mm	IDI_ECOLI	2018-09-27 01:08:51.522093+00:00	hours		2.1316
54255	Limonene data for ART	B.Mm	DH1 with single plasmid (medium-copy) expression system for production of Limonene		EZrich (Teknova) 1% Glucose	1.2	Targeted Proteomics	55329	B.Mm	ATOB_ECOLI	2018-09-27 01:08:51.522093+00:00	hours		0.3823
54255	Limonene data for ART	B.Mm	DH1 with single plasmid (medium-copy) expression system for production of Limonene		EZrich (Teknova) 1% Glucose	1.2	Targeted Proteomics	55329	B.Mm	Q8LKJ3_ABIGR	2018-09-27 01:08:51.522093+00:00	hours		0.558
54255	Limonene data for ART	B.Mm	DH1 with single plasmid (medium-copy) expression system for production of Limonene		EZrich (Teknova) 1% Glucose	1.2	Targeted Proteomics	55329	B.Mm	Q9FD87_STAAU	2018-09-27 01:08:51.522093+00:00	hours		1.1383
54255	Limonene data for ART	B.Mm	DH1 with single plasmid (medium-copy) expression system for production of Limonene		EZrich (Teknova) 1% Glucose	1.2	Targeted Proteomics	55329	B.Mm	Q9FD86_STAAU	2018-09-27 01:08:51.522093+00:00	hours		0.9078
54255	Limonene data for ART	B.Mm	DH1 with single plasmid (medium-copy) expression system for production of Limonene		EZrich (Teknova) 1% Glucose	1.2	Targeted Proteomics	55329	B.Mm	KIME_YEAST	2018-09-27 01:08:51.522093+00:00	hours		0.372
54255	Limonene data for ART	B.Mm	DH1 with single plasmid (medium-copy) expression system for production of Limonene		EZrich (Teknova) 1% Glucose	1.2	Targeted Proteomics	55329	B.Mm	ERG8_YEAST	2018-09-27 01:08:51.522093+00:00	hours		0.6969
54255	Limonene data for ART	2X.Ll	DH1 with two plasmid (medium + high copy) expression system for production of Limonene		EZrich (Teknova) 1% Glucose	0.2	Targeted Proteomics	55330	2X.Ll	MVD1_YEAST	2018-09-27 01:08:51.522093+00:00	hours		1.9367
54255	Limonene data for ART	2X.Ll	DH1 with two plasmid (medium + high copy) expression system for production of Limonene		EZrich (Teknova) 1% Glucose	0.2	Targeted Proteomics	55330	2X.Ll	Q40322_MENSP	2018-09-27 01:08:51.522093+00:00	hours		3.0677
54255	Limonene data for ART	2X.Ll	DH1 with two plasmid (medium + high copy) expression system for production of Limonene		EZrich (Teknova) 1% Glucose	0.2	Targeted Proteomics	55330	2X.Ll	IDI_ECOLI	2018-09-27 01:08:51.522093+00:00	hours		1.5995
54255	Limonene data for ART	2X.Ll	DH1 with two plasmid (medium + high copy) expression system for production of Limonene		EZrich (Teknova) 1% Glucose	0.2	Targeted Proteomics	55330	2X.Ll	ATOB_ECOLI	2018-09-27 01:08:51.522093+00:00	hours		0.0457
54255	Limonene data for ART	2X.Ll	DH1 with two plasmid (medium + high copy) expression system for production of Limonene		EZrich (Teknova) 1% Glucose	0.2	Targeted Proteomics	55330	2X.Ll	Q8LKJ3_ABIGR	2018-09-27 01:08:51.522093+00:00	hours		0.1423
54255	Limonene data for ART	2X.Ll	DH1 with two plasmid (medium + high copy) expression system for production of Limonene		EZrich (Teknova) 1% Glucose	0.2	Targeted Proteomics	55330	2X.Ll	Q9FD87_STAAU	2018-09-27 01:08:51.522093+00:00	hours		0.121
54255	Limonene data for ART	2X.Ll	DH1 with two plasmid (medium + high copy) expression system for production of Limonene		EZrich (Teknova) 1% Glucose	0.2	Targeted Proteomics	55330	2X.Ll	Q9FD86_STAAU	2018-09-27 01:08:51.522093+00:00	hours		0.0998
54255	Limonene data for ART	2X.Ll	DH1 with two plasmid (medium + high copy) expression system for production of Limonene		EZrich (Teknova) 1% Glucose	0.2	Targeted Proteomics	55330	2X.Ll	KIME_YEAST	2018-09-27 01:08:51.522093+00:00	hours		0.2709
54255	Limonene data for ART	2X.Ll	DH1 with two plasmid (medium + high copy) expression system for production of Limonene		EZrich (Teknova) 1% Glucose	0.2	Targeted Proteomics	55330	2X.Ll	ERG8_YEAST	2018-09-27 01:08:51.522093+00:00	hours		0.4691
54255	Limonene data for ART	2X.Lm	DH1 with two plasmid (medium + high copy) expression system for production of Limonene		EZrich (Teknova) 1% Glucose	0.2	Targeted Proteomics	55331	2X.Lm	MVD1_YEAST	2018-09-27 01:08:51.522093+00:00	hours		1.6258
54255	Limonene data for ART	2X.Lm	DH1 with two plasmid (medium + high copy) expression system for production of Limonene		EZrich (Teknova) 1% Glucose	0.2	Targeted Proteomics	55331	2X.Lm	Q40322_MENSP	2018-09-27 01:08:51.522093+00:00	hours		8.4749
54255	Limonene data for ART	2X.Lm	DH1 with two plasmid (medium + high copy) expression system for production of Limonene		EZrich (Teknova) 1% Glucose	0.2	Targeted Proteomics	55331	2X.Lm	IDI_ECOLI	2018-09-27 01:08:51.522093+00:00	hours		2.5226
54255	Limonene data for ART	2X.Lm	DH1 with two plasmid (medium + high copy) expression system for production of Limonene		EZrich (Teknova) 1% Glucose	0.2	Targeted Proteomics	55331	2X.Lm	ATOB_ECOLI	2018-09-27 01:08:51.522093+00:00	hours		0.172
54255	Limonene data for ART	2X.Lm	DH1 with two plasmid (medium + high copy) expression system for production of Limonene		EZrich (Teknova) 1% Glucose	0.2	Targeted Proteomics	55331	2X.Lm	Q8LKJ3_ABIGR	2018-09-27 01:08:51.522093+00:00	hours		0.2245
54255	Limonene data for ART	2X.Lm	DH1 with two plasmid (medium + high copy) expression system for production of Limonene		EZrich (Teknova) 1% Glucose	0.2	Targeted Proteomics	55331	2X.Lm	Q9FD87_STAAU	2018-09-27 01:08:51.522093+00:00	hours		0.4944
54255	Limonene data for ART	2X.Lm	DH1 with two plasmid (medium + high copy) expression system for production of Limonene		EZrich (Teknova) 1% Glucose	0.2	Targeted Proteomics	55331	2X.Lm	Q9FD86_STAAU	2018-09-27 01:08:51.522093+00:00	hours		0.4305
54255	Limonene data for ART	2X.Lm	DH1 with two plasmid (medium + high copy) expression system for production of Limonene		EZrich (Teknova) 1% Glucose	0.2	Targeted Proteomics	55331	2X.Lm	KIME_YEAST	2018-09-27 01:08:51.522093+00:00	hours		0.3043
54255	Limonene data for ART	2X.Lm	DH1 with two plasmid (medium + high copy) expression system for production of Limonene		EZrich (Teknova) 1% Glucose	0.2	Targeted Proteomics	55331	2X.Lm	ERG8_YEAST	2018-09-27 01:08:51.522093+00:00	hours		0.6213
54255	Limonene data for ART	2X.Lh	DH1 with two plasmid (medium + high copy) expression system for production of Limonene		EZrich (Teknova) 1% Glucose	0.2	Targeted Proteomics	55332	2X.Lh	MVD1_YEAST	2018-09-27 01:08:51.522093+00:00	hours		1.745
54255	Limonene data for ART	2X.Lh	DH1 with two plasmid (medium + high copy) expression system for production of Limonene		EZrich (Teknova) 1% Glucose	0.2	Targeted Proteomics	55332	2X.Lh	Q40322_MENSP	2018-09-27 01:08:51.522093+00:00	hours		9.1728
54255	Limonene data for ART	2X.Lh	DH1 with two plasmid (medium + high copy) expression system for production of Limonene		EZrich (Teknova) 1% Glucose	0.2	Targeted Proteomics	55332	2X.Lh	IDI_ECOLI	2018-09-27 01:08:51.522093+00:00	hours		2.3338
54255	Limonene data for ART	2X.Lh	DH1 with two plasmid (medium + high copy) expression system for production of Limonene		EZrich (Teknova) 1% Glucose	0.2	Targeted Proteomics	55332	2X.Lh	ATOB_ECOLI	2018-09-27 01:08:51.522093+00:00	hours		0.2335
54255	Limonene data for ART	2X.Lh	DH1 with two plasmid (medium + high copy) expression system for production of Limonene		EZrich (Teknova) 1% Glucose	0.2	Targeted Proteomics	55332	2X.Lh	Q8LKJ3_ABIGR	2018-09-27 01:08:51.522093+00:00	hours		0.2534
54255	Limonene data for ART	2X.Lh	DH1 with two plasmid (medium + high copy) expression system for production of Limonene		EZrich (Teknova) 1% Glucose	0.2	Targeted Proteomics	55332	2X.Lh	Q9FD87_STAAU	2018-09-27 01:08:51.522093+00:00	hours		0.6607
54255	Limonene data for ART	2X.Lh	DH1 with two plasmid (medium + high copy) expression system for production of Limonene		EZrich (Teknova) 1% Glucose	0.2	Targeted Proteomics	55332	2X.Lh	Q9FD86_STAAU	2018-09-27 01:08:51.522093+00:00	hours		0.6998
54255	Limonene data for ART	2X.Lh	DH1 with two plasmid (medium + high copy) expression system for production of Limonene		EZrich (Teknova) 1% Glucose	0.2	Targeted Proteomics	55332	2X.Lh	KIME_YEAST	2018-09-27 01:08:51.522093+00:00	hours		0.3196
54255	Limonene data for ART	2X.Lh	DH1 with two plasmid (medium + high copy) expression system for production of Limonene		EZrich (Teknova) 1% Glucose	0.2	Targeted Proteomics	55332	2X.Lh	ERG8_YEAST	2018-09-27 01:08:51.522093+00:00	hours		0.7463
54255	Limonene data for ART	A.Hh	DH1 with single plasmid (high-copy) expression system for production of Limonene		EZrich (Teknova) 1% Glucose	2.5	Targeted Proteomics	55333	A.Hh	MVD1_YEAST	2018-09-27 01:08:51.522093+00:00	hours		1.7236
54255	Limonene data for ART	A.Hh	DH1 with single plasmid (high-copy) expression system for production of Limonene		EZrich (Teknova) 1% Glucose	2.5	Targeted Proteomics	55333	A.Hh	Q40322_MENSP	2018-09-27 01:08:51.522093+00:00	hours		3.4534
54255	Limonene data for ART	A.Hh	DH1 with single plasmid (high-copy) expression system for production of Limonene		EZrich (Teknova) 1% Glucose	2.5	Targeted Proteomics	55333	A.Hh	IDI_ECOLI	2018-09-27 01:08:51.522093+00:00	hours		1.5637
54255	Limonene data for ART	A.Hh	DH1 with single plasmid (high-copy) expression system for production of Limonene		EZrich (Teknova) 1% Glucose	2.5	Targeted Proteomics	55333	A.Hh	ATOB_ECOLI	2018-09-27 01:08:51.522093+00:00	hours		1.1002
54255	Limonene data for ART	A.Hh	DH1 with single plasmid (high-copy) expression system for production of Limonene		EZrich (Teknova) 1% Glucose	2.5	Targeted Proteomics	55333	A.Hh	Q8LKJ3_ABIGR	2018-09-27 01:08:51.522093+00:00	hours		0.2948
54255	Limonene data for ART	A.Hh	DH1 with single plasmid (high-copy) expression system for production of Limonene		EZrich (Teknova) 1% Glucose	2.5	Targeted Proteomics	55333	A.Hh	Q9FD87_STAAU	2018-09-27 01:08:51.522093+00:00	hours		2.5927
54255	Limonene data for ART	A.Hh	DH1 with single plasmid (high-copy) expression system for production of Limonene		EZrich (Teknova) 1% Glucose	2.5	Targeted Proteomics	55333	A.Hh	Q9FD86_STAAU	2018-09-27 01:08:51.522093+00:00	hours		1.6579
54255	Limonene data for ART	A.Hh	DH1 with single plasmid (high-copy) expression system for production of Limonene		EZrich (Teknova) 1% Glucose	2.5	Targeted Proteomics	55333	A.Hh	KIME_YEAST	2018-09-27 01:08:51.522093+00:00	hours		0.3753
54255	Limonene data for ART	A.Hh	DH1 with single plasmid (high-copy) expression system for production of Limonene		EZrich (Teknova) 1% Glucose	2.5	Targeted Proteomics	55333	A.Hh	ERG8_YEAST	2018-09-27 01:08:51.522093+00:00	hours		0.9434
54255	Limonene data for ART	A.Hl	DH1 with single plasmid (high-copy) expression system for production of Limonene		EZrich (Teknova) 1% Glucose	2.5	Targeted Proteomics	55334	A.Hl	MVD1_YEAST	2018-09-27 01:08:51.522093+00:00	hours		1.818
54255	Limonene data for ART	A.Hl	DH1 with single plasmid (high-copy) expression system for production of Limonene		EZrich (Teknova) 1% Glucose	2.5	Targeted Proteomics	55334	A.Hl	Q40322_MENSP	2018-09-27 01:08:51.522093+00:00	hours		2.7662
54255	Limonene data for ART	A.Hl	DH1 with single plasmid (high-copy) expression system for production of Limonene		EZrich (Teknova) 1% Glucose	2.5	Targeted Proteomics	55334	A.Hl	IDI_ECOLI	2018-09-27 01:08:51.522093+00:00	hours		1.7929
54255	Limonene data for ART	A.Hl	DH1 with single plasmid (high-copy) expression system for production of Limonene		EZrich (Teknova) 1% Glucose	2.5	Targeted Proteomics	55334	A.Hl	ATOB_ECOLI	2018-09-27 01:08:51.522093+00:00	hours		0.8146
54255	Limonene data for ART	A.Hl	DH1 with single plasmid (high-copy) expression system for production of Limonene		EZrich (Teknova) 1% Glucose	2.5	Targeted Proteomics	55334	A.Hl	Q8LKJ3_ABIGR	2018-09-27 01:08:51.522093+00:00	hours		0.1568
54255	Limonene data for ART	A.Hl	DH1 with single plasmid (high-copy) expression system for production of Limonene		EZrich (Teknova) 1% Glucose	2.5	Targeted Proteomics	55334	A.Hl	Q9FD87_STAAU	2018-09-27 01:08:51.522093+00:00	hours		2.0862
54255	Limonene data for ART	A.Hl	DH1 with single plasmid (high-copy) expression system for production of Limonene		EZrich (Teknova) 1% Glucose	2.5	Targeted Proteomics	55334	A.Hl	Q9FD86_STAAU	2018-09-27 01:08:51.522093+00:00	hours		1.5467
54255	Limonene data for ART	A.Hl	DH1 with single plasmid (high-copy) expression system for production of Limonene		EZrich (Teknova) 1% Glucose	2.5	Targeted Proteomics	55334	A.Hl	KIME_YEAST	2018-09-27 01:08:51.522093+00:00	hours		0.3488
54255	Limonene data for ART	A.Hl	DH1 with single plasmid (high-copy) expression system for production of Limonene		EZrich (Teknova) 1% Glucose	2.5	Targeted Proteomics	55334	A.Hl	ERG8_YEAST	2018-09-27 01:08:51.522093+00:00	hours		0.7214
54255	Limonene data for ART	A.Hm	DH1 with single plasmid (high-copy) expression system for production of Limonene		EZrich (Teknova) 1% Glucose	2.5	Targeted Proteomics	55335	A.Hm	MVD1_YEAST	2018-09-27 01:08:51.522093+00:00	hours		1.7259
54255	Limonene data for ART	A.Hm	DH1 with single plasmid (high-copy) expression system for production of Limonene		EZrich (Teknova) 1% Glucose	2.5	Targeted Proteomics	55335	A.Hm	Q40322_MENSP	2018-09-27 01:08:51.522093+00:00	hours		3.1119
54255	Limonene data for ART	A.Hm	DH1 with single plasmid (high-copy) expression system for production of Limonene		EZrich (Teknova) 1% Glucose	2.5	Targeted Proteomics	55335	A.Hm	IDI_ECOLI	2018-09-27 01:08:51.522093+00:00	hours		1.6173
54255	Limonene data for ART	A.Hm	DH1 with single plasmid (high-copy) expression system for production of Limonene		EZrich (Teknova) 1% Glucose	2.5	Targeted Proteomics	55335	A.Hm	ATOB_ECOLI	2018-09-27 01:08:51.522093+00:00	hours		0.9479
54255	Limonene data for ART	A.Hm	DH1 with single plasmid (high-copy) expression system for production of Limonene		EZrich (Teknova) 1% Glucose	2.5	Targeted Proteomics	55335	A.Hm	Q8LKJ3_ABIGR	2018-09-27 01:08:51.522093+00:00	hours		0.2173
54255	Limonene data for ART	A.Hm	DH1 with single plasmid (high-copy) expression system for production of Limonene		EZrich (Teknova) 1% Glucose	2.5	Targeted Proteomics	55335	A.Hm	Q9FD87_STAAU	2018-09-27 01:08:51.522093+00:00	hours		2.4178
54255	Limonene data for ART	A.Hm	DH1 with single plasmid (high-copy) expression system for production of Limonene		EZrich (Teknova) 1% Glucose	2.5	Targeted Proteomics	55335	A.Hm	Q9FD86_STAAU	2018-09-27 01:08:51.522093+00:00	hours		1.6963
54255	Limonene data for ART	A.Hm	DH1 with single plasmid (high-copy) expression system for production of Limonene		EZrich (Teknova) 1% Glucose	2.5	Targeted Proteomics	55335	A.Hm	KIME_YEAST	2018-09-27 01:08:51.522093+00:00	hours		0.3497
54255	Limonene data for ART	A.Hm	DH1 with single plasmid (high-copy) expression system for production of Limonene		EZrich (Teknova) 1% Glucose	2.5	Targeted Proteomics	55335	A.Hm	ERG8_YEAST	2018-09-27 01:08:51.522093+00:00	hours		0.7748
54255	Limonene data for ART	2X.Hh	DH1 with two plasmid (medium + high copy) expression system for production of Limonene		EZrich (Teknova) 1% Glucose	2.5	Targeted Proteomics	55336	2X.Hh	MVD1_YEAST	2018-09-27 01:08:51.522093+00:00	hours		0.8337
54255	Limonene data for ART	2X.Hh	DH1 with two plasmid (medium + high copy) expression system for production of Limonene		EZrich (Teknova) 1% Glucose	2.5	Targeted Proteomics	55336	2X.Hh	Q40322_MENSP	2018-09-27 01:08:51.522093+00:00	hours		3.8485
54255	Limonene data for ART	2X.Hh	DH1 with two plasmid (medium + high copy) expression system for production of Limonene		EZrich (Teknova) 1% Glucose	2.5	Targeted Proteomics	55336	2X.Hh	IDI_ECOLI	2018-09-27 01:08:51.522093+00:00	hours		0.997
54255	Limonene data for ART	2X.Hh	DH1 with two plasmid (medium + high copy) expression system for production of Limonene		EZrich (Teknova) 1% Glucose	2.5	Targeted Proteomics	55336	2X.Hh	ATOB_ECOLI	2018-09-27 01:08:51.522093+00:00	hours		0.128
54255	Limonene data for ART	2X.Hh	DH1 with two plasmid (medium + high copy) expression system for production of Limonene		EZrich (Teknova) 1% Glucose	2.5	Targeted Proteomics	55336	2X.Hh	Q8LKJ3_ABIGR	2018-09-27 01:08:51.522093+00:00	hours		0.3746
54255	Limonene data for ART	2X.Hh	DH1 with two plasmid (medium + high copy) expression system for production of Limonene		EZrich (Teknova) 1% Glucose	2.5	Targeted Proteomics	55336	2X.Hh	Q9FD87_STAAU	2018-09-27 01:08:51.522093+00:00	hours		0.2126
54255	Limonene data for ART	2X.Hh	DH1 with two plasmid (medium + high copy) expression system for production of Limonene		EZrich (Teknova) 1% Glucose	2.5	Targeted Proteomics	55336	2X.Hh	Q9FD86_STAAU	2018-09-27 01:08:51.522093+00:00	hours		0.1193
54255	Limonene data for ART	2X.Hh	DH1 with two plasmid (medium + high copy) expression system for production of Limonene		EZrich (Teknova) 1% Glucose	2.5	Targeted Proteomics	55336	2X.Hh	KIME_YEAST	2018-09-27 01:08:51.522093+00:00	hours		0.1686
54255	Limonene data for ART	2X.Hh	DH1 with two plasmid (medium + high copy) expression system for production of Limonene		EZrich (Teknova) 1% Glucose	2.5	Targeted Proteomics	55336	2X.Hh	ERG8_YEAST	2018-09-27 01:08:51.522093+00:00	hours		0.4947
54255	Limonene data for ART	A.Lm	DH1 with single plasmid (high-copy) expression system for production of Limonene		EZrich (Teknova) 1% Glucose	0.2	Targeted Proteomics	55337	A.Lm	MVD1_YEAST	2018-09-27 01:08:51.522093+00:00	hours		0.6106
54255	Limonene data for ART	A.Lm	DH1 with single plasmid (high-copy) expression system for production of Limonene		EZrich (Teknova) 1% Glucose	0.2	Targeted Proteomics	55337	A.Lm	Q40322_MENSP	2018-09-27 01:08:51.522093+00:00	hours		5.0924
54255	Limonene data for ART	A.Lm	DH1 with single plasmid (high-copy) expression system for production of Limonene		EZrich (Teknova) 1% Glucose	0.2	Targeted Proteomics	55337	A.Lm	IDI_ECOLI	2018-09-27 01:08:51.522093+00:00	hours		1.2131
54255	Limonene data for ART	A.Lm	DH1 with single plasmid (high-copy) expression system for production of Limonene		EZrich (Teknova) 1% Glucose	0.2	Targeted Proteomics	55337	A.Lm	ATOB_ECOLI	2018-09-27 01:08:51.522093+00:00	hours		1.0796
54255	Limonene data for ART	A.Lm	DH1 with single plasmid (high-copy) expression system for production of Limonene		EZrich (Teknova) 1% Glucose	0.2	Targeted Proteomics	55337	A.Lm	Q8LKJ3_ABIGR	2018-09-27 01:08:51.522093+00:00	hours		2.7061
54255	Limonene data for ART	A.Lm	DH1 with single plasmid (high-copy) expression system for production of Limonene		EZrich (Teknova) 1% Glucose	0.2	Targeted Proteomics	55337	A.Lm	Q9FD87_STAAU	2018-09-27 01:08:51.522093+00:00	hours		3.9671
54255	Limonene data for ART	A.Lm	DH1 with single plasmid (high-copy) expression system for production of Limonene		EZrich (Teknova) 1% Glucose	0.2	Targeted Proteomics	55337	A.Lm	Q9FD86_STAAU	2018-09-27 01:08:51.522093+00:00	hours		3.597
54255	Limonene data for ART	A.Lm	DH1 with single plasmid (high-copy) expression system for production of Limonene		EZrich (Teknova) 1% Glucose	0.2	Targeted Proteomics	55337	A.Lm	KIME_YEAST	2018-09-27 01:08:51.522093+00:00	hours		0.1909
54255	Limonene data for ART	A.Lm	DH1 with single plasmid (high-copy) expression system for production of Limonene		EZrich (Teknova) 1% Glucose	0.2	Targeted Proteomics	55337	A.Lm	ERG8_YEAST	2018-09-27 01:08:51.522093+00:00	hours		0.7008
54255	Limonene data for ART	A.Lh	DH1 with single plasmid (high-copy) expression system for production of Limonene		EZrich (Teknova) 1% Glucose	0.2	Targeted Proteomics	55338	A.Lh	MVD1_YEAST	2018-09-27 01:08:51.522093+00:00	hours		0.4215
54255	Limonene data for ART	A.Lh	DH1 with single plasmid (high-copy) expression system for production of Limonene		EZrich (Teknova) 1% Glucose	0.2	Targeted Proteomics	55338	A.Lh	Q40322_MENSP	2018-09-27 01:08:51.522093+00:00	hours		4.2606
54255	Limonene data for ART	A.Lh	DH1 with single plasmid (high-copy) expression system for production of Limonene		EZrich (Teknova) 1% Glucose	0.2	Targeted Proteomics	55338	A.Lh	IDI_ECOLI	2018-09-27 01:08:51.522093+00:00	hours		0.7143
54255	Limonene data for ART	A.Lh	DH1 with single plasmid (high-copy) expression system for production of Limonene		EZrich (Teknova) 1% Glucose	0.2	Targeted Proteomics	55338	A.Lh	ATOB_ECOLI	2018-09-27 01:08:51.522093+00:00	hours		0.845
54255	Limonene data for ART	A.Lh	DH1 with single plasmid (high-copy) expression system for production of Limonene		EZrich (Teknova) 1% Glucose	0.2	Targeted Proteomics	55338	A.Lh	Q8LKJ3_ABIGR	2018-09-27 01:08:51.522093+00:00	hours		2.3296
54255	Limonene data for ART	A.Lh	DH1 with single plasmid (high-copy) expression system for production of Limonene		EZrich (Teknova) 1% Glucose	0.2	Targeted Proteomics	55338	A.Lh	Q9FD87_STAAU	2018-09-27 01:08:51.522093+00:00	hours		3.3589
54255	Limonene data for ART	A.Lh	DH1 with single plasmid (high-copy) expression system for production of Limonene		EZrich (Teknova) 1% Glucose	0.2	Targeted Proteomics	55338	A.Lh	Q9FD86_STAAU	2018-09-27 01:08:51.522093+00:00	hours		2.1591
54255	Limonene data for ART	A.Lh	DH1 with single plasmid (high-copy) expression system for production of Limonene		EZrich (Teknova) 1% Glucose	0.2	Targeted Proteomics	55338	A.Lh	KIME_YEAST	2018-09-27 01:08:51.522093+00:00	hours		0.0983
54255	Limonene data for ART	A.Lh	DH1 with single plasmid (high-copy) expression system for production of Limonene		EZrich (Teknova) 1% Glucose	0.2	Targeted Proteomics	55338	A.Lh	ERG8_YEAST	2018-09-27 01:08:51.522093+00:00	hours		0.4334
54255	Limonene data for ART	2X.Hm	DH1 with two plasmid (medium + high copy) expression system for production of Limonene		EZrich (Teknova) 1% Glucose	2.5	Targeted Proteomics	55339	2X.Hm	MVD1_YEAST	2018-09-27 01:08:51.522093+00:00	hours		0.6176
54255	Limonene data for ART	2X.Hm	DH1 with two plasmid (medium + high copy) expression system for production of Limonene		EZrich (Teknova) 1% Glucose	2.5	Targeted Proteomics	55339	2X.Hm	Q40322_MENSP	2018-09-27 01:08:51.522093+00:00	hours		2.8899
54255	Limonene data for ART	2X.Hm	DH1 with two plasmid (medium + high copy) expression system for production of Limonene		EZrich (Teknova) 1% Glucose	2.5	Targeted Proteomics	55339	2X.Hm	IDI_ECOLI	2018-09-27 01:08:51.522093+00:00	hours		0.9134
54255	Limonene data for ART	2X.Hm	DH1 with two plasmid (medium + high copy) expression system for production of Limonene		EZrich (Teknova) 1% Glucose	2.5	Targeted Proteomics	55339	2X.Hm	ATOB_ECOLI	2018-09-27 01:08:51.522093+00:00	hours		0.0627
54255	Limonene data for ART	2X.Hm	DH1 with two plasmid (medium + high copy) expression system for production of Limonene		EZrich (Teknova) 1% Glucose	2.5	Targeted Proteomics	55339	2X.Hm	Q8LKJ3_ABIGR	2018-09-27 01:08:51.522093+00:00	hours		0.1837
54255	Limonene data for ART	2X.Hm	DH1 with two plasmid (medium + high copy) expression system for production of Limonene		EZrich (Teknova) 1% Glucose	2.5	Targeted Proteomics	55339	2X.Hm	Q9FD87_STAAU	2018-09-27 01:08:51.522093+00:00	hours		0.1721
54255	Limonene data for ART	2X.Hm	DH1 with two plasmid (medium + high copy) expression system for production of Limonene		EZrich (Teknova) 1% Glucose	2.5	Targeted Proteomics	55339	2X.Hm	Q9FD86_STAAU	2018-09-27 01:08:51.522093+00:00	hours		0.0894
54255	Limonene data for ART	2X.Hm	DH1 with two plasmid (medium + high copy) expression system for production of Limonene		EZrich (Teknova) 1% Glucose	2.5	Targeted Proteomics	55339	2X.Hm	KIME_YEAST	2018-09-27 01:08:51.522093+00:00	hours		0.106
54255	Limonene data for ART	2X.Hm	DH1 with two plasmid (medium + high copy) expression system for production of Limonene		EZrich (Teknova) 1% Glucose	2.5	Targeted Proteomics	55339	2X.Hm	ERG8_YEAST	2018-09-27 01:08:51.522093+00:00	hours		0.1899
54255	Limonene data for ART	B.Lh	DH1 with single plasmid (medium-copy) expression system for production of Limonene		EZrich (Teknova) 1% Glucose	0.2	Targeted Proteomics	55340	B.Lh	MVD1_YEAST	2018-09-27 01:08:51.522093+00:00	hours		0.8685
54255	Limonene data for ART	B.Lh	DH1 with single plasmid (medium-copy) expression system for production of Limonene		EZrich (Teknova) 1% Glucose	0.2	Targeted Proteomics	55340	B.Lh	Q40322_MENSP	2018-09-27 01:08:51.522093+00:00	hours		3.2706
54255	Limonene data for ART	B.Lh	DH1 with single plasmid (medium-copy) expression system for production of Limonene		EZrich (Teknova) 1% Glucose	0.2	Targeted Proteomics	55340	B.Lh	IDI_ECOLI	2018-09-27 01:08:51.522093+00:00	hours		1.1697
54255	Limonene data for ART	B.Lh	DH1 with single plasmid (medium-copy) expression system for production of Limonene		EZrich (Teknova) 1% Glucose	0.2	Targeted Proteomics	55340	B.Lh	ATOB_ECOLI	2018-09-27 01:08:51.522093+00:00	hours		0.4027
54255	Limonene data for ART	B.Lh	DH1 with single plasmid (medium-copy) expression system for production of Limonene		EZrich (Teknova) 1% Glucose	0.2	Targeted Proteomics	55340	B.Lh	Q8LKJ3_ABIGR	2018-09-27 01:08:51.522093+00:00	hours		0.4241
54255	Limonene data for ART	B.Lh	DH1 with single plasmid (medium-copy) expression system for production of Limonene		EZrich (Teknova) 1% Glucose	0.2	Targeted Proteomics	55340	B.Lh	Q9FD87_STAAU	2018-09-27 01:08:51.522093+00:00	hours		1.3571
54255	Limonene data for ART	B.Lh	DH1 with single plasmid (medium-copy) expression system for production of Limonene		EZrich (Teknova) 1% Glucose	0.2	Targeted Proteomics	55340	B.Lh	Q9FD86_STAAU	2018-09-27 01:08:51.522093+00:00	hours		1.3151
54255	Limonene data for ART	B.Lh	DH1 with single plasmid (medium-copy) expression system for production of Limonene		EZrich (Teknova) 1% Glucose	0.2	Targeted Proteomics	55340	B.Lh	KIME_YEAST	2018-09-27 01:08:51.522093+00:00	hours		0.104
54255	Limonene data for ART	B.Lh	DH1 with single plasmid (medium-copy) expression system for production of Limonene		EZrich (Teknova) 1% Glucose	0.2	Targeted Proteomics	55340	B.Lh	ERG8_YEAST	2018-09-27 01:08:51.522093+00:00	hours		0.3194
54255	Limonene data for ART	B.Lm	DH1 with single plasmid (medium-copy) expression system for production of Limonene		EZrich (Teknova) 1% Glucose	0.2	Targeted Proteomics	55341	B.Lm	MVD1_YEAST	2018-09-27 01:08:51.522093+00:00	hours		0.901
54255	Limonene data for ART	B.Lm	DH1 with single plasmid (medium-copy) expression system for production of Limonene		EZrich (Teknova) 1% Glucose	0.2	Targeted Proteomics	55341	B.Lm	Q40322_MENSP	2018-09-27 01:08:51.522093+00:00	hours		3.5506
54255	Limonene data for ART	B.Lm	DH1 with single plasmid (medium-copy) expression system for production of Limonene		EZrich (Teknova) 1% Glucose	0.2	Targeted Proteomics	55341	B.Lm	IDI_ECOLI	2018-09-27 01:08:51.522093+00:00	hours		1.0638
54255	Limonene data for ART	B.Lm	DH1 with single plasmid (medium-copy) expression system for production of Limonene		EZrich (Teknova) 1% Glucose	0.2	Targeted Proteomics	55341	B.Lm	ATOB_ECOLI	2018-09-27 01:08:51.522093+00:00	hours		0.355
54255	Limonene data for ART	B.Lm	DH1 with single plasmid (medium-copy) expression system for production of Limonene		EZrich (Teknova) 1% Glucose	0.2	Targeted Proteomics	55341	B.Lm	Q8LKJ3_ABIGR	2018-09-27 01:08:51.522093+00:00	hours		0.287
54255	Limonene data for ART	B.Lm	DH1 with single plasmid (medium-copy) expression system for production of Limonene		EZrich (Teknova) 1% Glucose	0.2	Targeted Proteomics	55341	B.Lm	Q9FD87_STAAU	2018-09-27 01:08:51.522093+00:00	hours		1.0254
54255	Limonene data for ART	B.Lm	DH1 with single plasmid (medium-copy) expression system for production of Limonene		EZrich (Teknova) 1% Glucose	0.2	Targeted Proteomics	55341	B.Lm	Q9FD86_STAAU	2018-09-27 01:08:51.522093+00:00	hours		0.8967
54255	Limonene data for ART	B.Lm	DH1 with single plasmid (medium-copy) expression system for production of Limonene		EZrich (Teknova) 1% Glucose	0.2	Targeted Proteomics	55341	B.Lm	KIME_YEAST	2018-09-27 01:08:51.522093+00:00	hours		0.2006
54255	Limonene data for ART	B.Lm	DH1 with single plasmid (medium-copy) expression system for production of Limonene		EZrich (Teknova) 1% Glucose	0.2	Targeted Proteomics	55341	B.Lm	ERG8_YEAST	2018-09-27 01:08:51.522093+00:00	hours		0.5061
54255	Limonene data for ART	B.Ll	DH1 with single plasmid (medium-copy) expression system for production of Limonene		EZrich (Teknova) 1% Glucose	0.2	Targeted Proteomics	55342	B.Ll	MVD1_YEAST	2018-09-27 01:08:51.522093+00:00	hours		0.9721
54255	Limonene data for ART	B.Ll	DH1 with single plasmid (medium-copy) expression system for production of Limonene		EZrich (Teknova) 1% Glucose	0.2	Targeted Proteomics	55342	B.Ll	Q40322_MENSP	2018-09-27 01:08:51.522093+00:00	hours		4.0899
54255	Limonene data for ART	B.Ll	DH1 with single plasmid (medium-copy) expression system for production of Limonene		EZrich (Teknova) 1% Glucose	0.2	Targeted Proteomics	55342	B.Ll	IDI_ECOLI	2018-09-27 01:08:51.522093+00:00	hours		1.477
54255	Limonene data for ART	B.Ll	DH1 with single plasmid (medium-copy) expression system for production of Limonene		EZrich (Teknova) 1% Glucose	0.2	Targeted Proteomics	55342	B.Ll	ATOB_ECOLI	2018-09-27 01:08:51.522093+00:00	hours		0.1318
54255	Limonene data for ART	B.Ll	DH1 with single plasmid (medium-copy) expression system for production of Limonene		EZrich (Teknova) 1% Glucose	0.2	Targeted Proteomics	55342	B.Ll	Q8LKJ3_ABIGR	2018-09-27 01:08:51.522093+00:00	hours		0.5781
54255	Limonene data for ART	B.Ll	DH1 with single plasmid (medium-copy) expression system for production of Limonene		EZrich (Teknova) 1% Glucose	0.2	Targeted Proteomics	55342	B.Ll	Q9FD87_STAAU	2018-09-27 01:08:51.522093+00:00	hours		0.2657
54255	Limonene data for ART	B.Ll	DH1 with single plasmid (medium-copy) expression system for production of Limonene		EZrich (Teknova) 1% Glucose	0.2	Targeted Proteomics	55342	B.Ll	Q9FD86_STAAU	2018-09-27 01:08:51.522093+00:00	hours		0.2137
54255	Limonene data for ART	B.Ll	DH1 with single plasmid (medium-copy) expression system for production of Limonene		EZrich (Teknova) 1% Glucose	0.2	Targeted Proteomics	55342	B.Ll	KIME_YEAST	2018-09-27 01:08:51.522093+00:00	hours		0.2028
54255	Limonene data for ART	B.Ll	DH1 with single plasmid (medium-copy) expression system for production of Limonene		EZrich (Teknova) 1% Glucose	0.2	Targeted Proteomics	55342	B.Ll	ERG8_YEAST	2018-09-27 01:08:51.522093+00:00	hours		0.3831
54255	Limonene data for ART	BL.Mh	DH1 with two plasmid (B + high with extra copy of LS) expression system for production of Limonene		EZrich (Teknova) 1% Glucose	1.2	Targeted Proteomics	55343	BL.Mh	MVD1_YEAST	2018-09-27 01:08:51.522093+00:00	hours		4.10495
54255	Limonene data for ART	BL.Mh	DH1 with two plasmid (B + high with extra copy of LS) expression system for production of Limonene		EZrich (Teknova) 1% Glucose	1.2	Targeted Proteomics	55343	BL.Mh	Q40322_MENSP	2018-09-27 01:08:51.522093+00:00	hours		13.5992
54255	Limonene data for ART	BL.Mh	DH1 with two plasmid (B + high with extra copy of LS) expression system for production of Limonene		EZrich (Teknova) 1% Glucose	1.2	Targeted Proteomics	55343	BL.Mh	IDI_ECOLI	2018-09-27 01:08:51.522093+00:00	hours		2.5955
54255	Limonene data for ART	BL.Mh	DH1 with two plasmid (B + high with extra copy of LS) expression system for production of Limonene		EZrich (Teknova) 1% Glucose	1.2	Targeted Proteomics	55343	BL.Mh	ATOB_ECOLI	2018-09-27 01:08:51.522093+00:00	hours		1.95983
54255	Limonene data for ART	BL.Mh	DH1 with two plasmid (B + high with extra copy of LS) expression system for production of Limonene		EZrich (Teknova) 1% Glucose	1.2	Targeted Proteomics	55343	BL.Mh	Q8LKJ3_ABIGR	2018-09-27 01:08:51.522093+00:00	hours		1.86762
54255	Limonene data for ART	BL.Mh	DH1 with two plasmid (B + high with extra copy of LS) expression system for production of Limonene		EZrich (Teknova) 1% Glucose	1.2	Targeted Proteomics	55343	BL.Mh	Q9FD87_STAAU	2018-09-27 01:08:51.522093+00:00	hours		0.65389
54255	Limonene data for ART	BL.Mh	DH1 with two plasmid (B + high with extra copy of LS) expression system for production of Limonene		EZrich (Teknova) 1% Glucose	1.2	Targeted Proteomics	55343	BL.Mh	Q9FD86_STAAU	2018-09-27 01:08:51.522093+00:00	hours		0.39057
54255	Limonene data for ART	BL.Mh	DH1 with two plasmid (B + high with extra copy of LS) expression system for production of Limonene		EZrich (Teknova) 1% Glucose	1.2	Targeted Proteomics	55343	BL.Mh	KIME_YEAST	2018-09-27 01:08:51.522093+00:00	hours		1.42496
54255	Limonene data for ART	BL.Mh	DH1 with two plasmid (B + high with extra copy of LS) expression system for production of Limonene		EZrich (Teknova) 1% Glucose	1.2	Targeted Proteomics	55343	BL.Mh	ERG8_YEAST	2018-09-27 01:08:51.522093+00:00	hours		0.7813
54255	Limonene data for ART	BL.Mm	DH1 with two plasmid (B + high with extra copy of LS) expression system for production of Limonene		EZrich (Teknova) 1% Glucose	1.2	Targeted Proteomics	55344	BL.Mm	MVD1_YEAST	2018-09-27 01:08:51.522093+00:00	hours		3.193
54255	Limonene data for ART	BL.Mm	DH1 with two plasmid (B + high with extra copy of LS) expression system for production of Limonene		EZrich (Teknova) 1% Glucose	1.2	Targeted Proteomics	55344	BL.Mm	Q40322_MENSP	2018-09-27 01:08:51.522093+00:00	hours		11.314
54255	Limonene data for ART	BL.Mm	DH1 with two plasmid (B + high with extra copy of LS) expression system for production of Limonene		EZrich (Teknova) 1% Glucose	1.2	Targeted Proteomics	55344	BL.Mm	IDI_ECOLI	2018-09-27 01:08:51.522093+00:00	hours		2.29065
54255	Limonene data for ART	BL.Mm	DH1 with two plasmid (B + high with extra copy of LS) expression system for production of Limonene		EZrich (Teknova) 1% Glucose	1.2	Targeted Proteomics	55344	BL.Mm	ATOB_ECOLI	2018-09-27 01:08:51.522093+00:00	hours		1.2554
54255	Limonene data for ART	BL.Mm	DH1 with two plasmid (B + high with extra copy of LS) expression system for production of Limonene		EZrich (Teknova) 1% Glucose	1.2	Targeted Proteomics	55344	BL.Mm	Q8LKJ3_ABIGR	2018-09-27 01:08:51.522093+00:00	hours		1.63235
54255	Limonene data for ART	BL.Mm	DH1 with two plasmid (B + high with extra copy of LS) expression system for production of Limonene		EZrich (Teknova) 1% Glucose	1.2	Targeted Proteomics	55344	BL.Mm	Q9FD87_STAAU	2018-09-27 01:08:51.522093+00:00	hours		0.41045
54255	Limonene data for ART	BL.Mm	DH1 with two plasmid (B + high with extra copy of LS) expression system for production of Limonene		EZrich (Teknova) 1% Glucose	1.2	Targeted Proteomics	55344	BL.Mm	Q9FD86_STAAU	2018-09-27 01:08:51.522093+00:00	hours		0.25975
54255	Limonene data for ART	BL.Mm	DH1 with two plasmid (B + high with extra copy of LS) expression system for production of Limonene		EZrich (Teknova) 1% Glucose	1.2	Targeted Proteomics	55344	BL.Mm	KIME_YEAST	2018-09-27 01:08:51.522093+00:00	hours		1.0486
54255	Limonene data for ART	BL.Mm	DH1 with two plasmid (B + high with extra copy of LS) expression system for production of Limonene		EZrich (Teknova) 1% Glucose	1.2	Targeted Proteomics	55344	BL.Mm	ERG8_YEAST	2018-09-27 01:08:51.522093+00:00	hours		0.58985
54255	Limonene data for ART	BL.Ml	DH1 with two plasmid (B + high with extra copy of LS) expression system for production of Limonene		EZrich (Teknova) 1% Glucose	1.2	Targeted Proteomics	55345	BL.Ml	MVD1_YEAST	2018-09-27 01:08:51.522093+00:00	hours		1.30811
54255	Limonene data for ART	BL.Ml	DH1 with two plasmid (B + high with extra copy of LS) expression system for production of Limonene		EZrich (Teknova) 1% Glucose	1.2	Targeted Proteomics	55345	BL.Ml	Q40322_MENSP	2018-09-27 01:08:51.522093+00:00	hours		2.72406
54255	Limonene data for ART	BL.Ml	DH1 with two plasmid (B + high with extra copy of LS) expression system for production of Limonene		EZrich (Teknova) 1% Glucose	1.2	Targeted Proteomics	55345	BL.Ml	IDI_ECOLI	2018-09-27 01:08:51.522093+00:00	hours		0.94884
54255	Limonene data for ART	BL.Ml	DH1 with two plasmid (B + high with extra copy of LS) expression system for production of Limonene		EZrich (Teknova) 1% Glucose	1.2	Targeted Proteomics	55345	BL.Ml	ATOB_ECOLI	2018-09-27 01:08:51.522093+00:00	hours		0.24012
54255	Limonene data for ART	BL.Ml	DH1 with two plasmid (B + high with extra copy of LS) expression system for production of Limonene		EZrich (Teknova) 1% Glucose	1.2	Targeted Proteomics	55345	BL.Ml	Q8LKJ3_ABIGR	2018-09-27 01:08:51.522093+00:00	hours		0.11237
54255	Limonene data for ART	BL.Ml	DH1 with two plasmid (B + high with extra copy of LS) expression system for production of Limonene		EZrich (Teknova) 1% Glucose	1.2	Targeted Proteomics	55345	BL.Ml	Q9FD87_STAAU	2018-09-27 01:08:51.522093+00:00	hours		0.08503
54255	Limonene data for ART	BL.Ml	DH1 with two plasmid (B + high with extra copy of LS) expression system for production of Limonene		EZrich (Teknova) 1% Glucose	1.2	Targeted Proteomics	55345	BL.Ml	Q9FD86_STAAU	2018-09-27 01:08:51.522093+00:00	hours		0.05002
54255	Limonene data for ART	BL.Ml	DH1 with two plasmid (B + high with extra copy of LS) expression system for production of Limonene		EZrich (Teknova) 1% Glucose	1.2	Targeted Proteomics	55345	BL.Ml	KIME_YEAST	2018-09-27 01:08:51.522093+00:00	hours		0.3807
54255	Limonene data for ART	BL.Ml	DH1 with two plasmid (B + high with extra copy of LS) expression system for production of Limonene		EZrich (Teknova) 1% Glucose	1.2	Targeted Proteomics	55345	BL.Ml	ERG8_YEAST	2018-09-27 01:08:51.522093+00:00	hours		0.1905
54255	Limonene data for ART	A.Ll	DH1 with single plasmid (high-copy) expression system for production of Limonene		EZrich (Teknova) 1% Glucose	0.2	Targeted Proteomics	55346	A.Ll	MVD1_YEAST	2018-09-27 01:08:51.522093+00:00	hours		1.639
54255	Limonene data for ART	A.Ll	DH1 with single plasmid (high-copy) expression system for production of Limonene		EZrich (Teknova) 1% Glucose	0.2	Targeted Proteomics	55346	A.Ll	Q40322_MENSP	2018-09-27 01:08:51.522093+00:00	hours		3.667
54255	Limonene data for ART	A.Ll	DH1 with single plasmid (high-copy) expression system for production of Limonene		EZrich (Teknova) 1% Glucose	0.2	Targeted Proteomics	55346	A.Ll	IDI_ECOLI	2018-09-27 01:08:51.522093+00:00	hours		2.0411
54255	Limonene data for ART	A.Ll	DH1 with single plasmid (high-copy) expression system for production of Limonene		EZrich (Teknova) 1% Glucose	0.2	Targeted Proteomics	55346	A.Ll	ATOB_ECOLI	2018-09-27 01:08:51.522093+00:00	hours		1.0751
54255	Limonene data for ART	A.Ll	DH1 with single plasmid (high-copy) expression system for production of Limonene		EZrich (Teknova) 1% Glucose	0.2	Targeted Proteomics	55346	A.Ll	Q8LKJ3_ABIGR	2018-09-27 01:08:51.522093+00:00	hours		0.1487
54255	Limonene data for ART	A.Ll	DH1 with single plasmid (high-copy) expression system for production of Limonene		EZrich (Teknova) 1% Glucose	0.2	Targeted Proteomics	55346	A.Ll	Q9FD87_STAAU	2018-09-27 01:08:51.522093+00:00	hours		4.3605
54255	Limonene data for ART	A.Ll	DH1 with single plasmid (high-copy) expression system for production of Limonene		EZrich (Teknova) 1% Glucose	0.2	Targeted Proteomics	55346	A.Ll	Q9FD86_STAAU	2018-09-27 01:08:51.522093+00:00	hours		3.3586
54255	Limonene data for ART	A.Ll	DH1 with single plasmid (high-copy) expression system for production of Limonene		EZrich (Teknova) 1% Glucose	0.2	Targeted Proteomics	55346	A.Ll	KIME_YEAST	2018-09-27 01:08:51.522093+00:00	hours		0.2554
54255	Limonene data for ART	A.Ll	DH1 with single plasmid (high-copy) expression system for production of Limonene		EZrich (Teknova) 1% Glucose	0.2	Targeted Proteomics	55346	A.Ll	ERG8_YEAST	2018-09-27 01:08:51.522093+00:00	hours		0.6607
54255	Limonene data for ART	2X.Mm	DH1 with two plasmid (medium + high copy) expression system for production of Limonene		EZrich (Teknova) 1% Glucose	1.2	Targeted Proteomics	55347	2X.Mm	MVD1_YEAST	2018-09-27 01:08:51.522093+00:00	hours		1.9592
54255	Limonene data for ART	2X.Mm	DH1 with two plasmid (medium + high copy) expression system for production of Limonene		EZrich (Teknova) 1% Glucose	1.2	Targeted Proteomics	55347	2X.Mm	Q40322_MENSP	2018-09-27 01:08:51.522093+00:00	hours		9.2338
54255	Limonene data for ART	2X.Mm	DH1 with two plasmid (medium + high copy) expression system for production of Limonene		EZrich (Teknova) 1% Glucose	1.2	Targeted Proteomics	55347	2X.Mm	IDI_ECOLI	2018-09-27 01:08:51.522093+00:00	hours		2.7354
54255	Limonene data for ART	2X.Mm	DH1 with two plasmid (medium + high copy) expression system for production of Limonene		EZrich (Teknova) 1% Glucose	1.2	Targeted Proteomics	55347	2X.Mm	ATOB_ECOLI	2018-09-27 01:08:51.522093+00:00	hours		0.2231
54255	Limonene data for ART	2X.Mm	DH1 with two plasmid (medium + high copy) expression system for production of Limonene		EZrich (Teknova) 1% Glucose	1.2	Targeted Proteomics	55347	2X.Mm	Q8LKJ3_ABIGR	2018-09-27 01:08:51.522093+00:00	hours		0.4335
54255	Limonene data for ART	2X.Mm	DH1 with two plasmid (medium + high copy) expression system for production of Limonene		EZrich (Teknova) 1% Glucose	1.2	Targeted Proteomics	55347	2X.Mm	Q9FD87_STAAU	2018-09-27 01:08:51.522093+00:00	hours		0.5409
54255	Limonene data for ART	2X.Mm	DH1 with two plasmid (medium + high copy) expression system for production of Limonene		EZrich (Teknova) 1% Glucose	1.2	Targeted Proteomics	55347	2X.Mm	Q9FD86_STAAU	2018-09-27 01:08:51.522093+00:00	hours		0.5118
54255	Limonene data for ART	2X.Mm	DH1 with two plasmid (medium + high copy) expression system for production of Limonene		EZrich (Teknova) 1% Glucose	1.2	Targeted Proteomics	55347	2X.Mm	KIME_YEAST	2018-09-27 01:08:51.522093+00:00	hours		0.3744
54255	Limonene data for ART	2X.Mm	DH1 with two plasmid (medium + high copy) expression system for production of Limonene		EZrich (Teknova) 1% Glucose	1.2	Targeted Proteomics	55347	2X.Mm	ERG8_YEAST	2018-09-27 01:08:51.522093+00:00	hours		0.7901
54255	Limonene data for ART	2X.Ml	DH1 with two plasmid (medium + high copy) expression system for production of Limonene		EZrich (Teknova) 1% Glucose	1.2	Targeted Proteomics	55348	2X.Ml	MVD1_YEAST	2018-09-27 01:08:51.522093+00:00	hours		1.2888
54255	Limonene data for ART	2X.Ml	DH1 with two plasmid (medium + high copy) expression system for production of Limonene		EZrich (Teknova) 1% Glucose	1.2	Targeted Proteomics	55348	2X.Ml	Q40322_MENSP	2018-09-27 01:08:51.522093+00:00	hours		2.3831
54255	Limonene data for ART	2X.Ml	DH1 with two plasmid (medium + high copy) expression system for production of Limonene		EZrich (Teknova) 1% Glucose	1.2	Targeted Proteomics	55348	2X.Ml	IDI_ECOLI	2018-09-27 01:08:51.522093+00:00	hours		1.3483
54255	Limonene data for ART	2X.Ml	DH1 with two plasmid (medium + high copy) expression system for production of Limonene		EZrich (Teknova) 1% Glucose	1.2	Targeted Proteomics	55348	2X.Ml	ATOB_ECOLI	2018-09-27 01:08:51.522093+00:00	hours		0.0375
54255	Limonene data for ART	2X.Ml	DH1 with two plasmid (medium + high copy) expression system for production of Limonene		EZrich (Teknova) 1% Glucose	1.2	Targeted Proteomics	55348	2X.Ml	Q8LKJ3_ABIGR	2018-09-27 01:08:51.522093+00:00	hours		0.0853
54255	Limonene data for ART	2X.Ml	DH1 with two plasmid (medium + high copy) expression system for production of Limonene		EZrich (Teknova) 1% Glucose	1.2	Targeted Proteomics	55348	2X.Ml	Q9FD87_STAAU	2018-09-27 01:08:51.522093+00:00	hours		0.0896
54255	Limonene data for ART	2X.Ml	DH1 with two plasmid (medium + high copy) expression system for production of Limonene		EZrich (Teknova) 1% Glucose	1.2	Targeted Proteomics	55348	2X.Ml	Q9FD86_STAAU	2018-09-27 01:08:51.522093+00:00	hours		0.0815
54255	Limonene data for ART	2X.Ml	DH1 with two plasmid (medium + high copy) expression system for production of Limonene		EZrich (Teknova) 1% Glucose	1.2	Targeted Proteomics	55348	2X.Ml	KIME_YEAST	2018-09-27 01:08:51.522093+00:00	hours		0.2513
54255	Limonene data for ART	2X.Ml	DH1 with two plasmid (medium + high copy) expression system for production of Limonene		EZrich (Teknova) 1% Glucose	1.2	Targeted Proteomics	55348	2X.Ml	ERG8_YEAST	2018-09-27 01:08:51.522093+00:00	hours		0.3804
54255	Limonene data for ART	2X.Mh	DH1 with two plasmid (medium + high copy) expression system for production of Limonene		EZrich (Teknova) 1% Glucose	1.2	Targeted Proteomics	55349	2X.Mh	MVD1_YEAST	2018-09-27 01:08:51.522093+00:00	hours		2.1936
54255	Limonene data for ART	2X.Mh	DH1 with two plasmid (medium + high copy) expression system for production of Limonene		EZrich (Teknova) 1% Glucose	1.2	Targeted Proteomics	55349	2X.Mh	Q40322_MENSP	2018-09-27 01:08:51.522093+00:00	hours		11.2037
54255	Limonene data for ART	2X.Mh	DH1 with two plasmid (medium + high copy) expression system for production of Limonene		EZrich (Teknova) 1% Glucose	1.2	Targeted Proteomics	55349	2X.Mh	IDI_ECOLI	2018-09-27 01:08:51.522093+00:00	hours		3.1813
54255	Limonene data for ART	2X.Mh	DH1 with two plasmid (medium + high copy) expression system for production of Limonene		EZrich (Teknova) 1% Glucose	1.2	Targeted Proteomics	55349	2X.Mh	ATOB_ECOLI	2018-09-27 01:08:51.522093+00:00	hours		0.2384
54255	Limonene data for ART	2X.Mh	DH1 with two plasmid (medium + high copy) expression system for production of Limonene		EZrich (Teknova) 1% Glucose	1.2	Targeted Proteomics	55349	2X.Mh	Q8LKJ3_ABIGR	2018-09-27 01:08:51.522093+00:00	hours		0.2968
54255	Limonene data for ART	2X.Mh	DH1 with two plasmid (medium + high copy) expression system for production of Limonene		EZrich (Teknova) 1% Glucose	1.2	Targeted Proteomics	55349	2X.Mh	Q9FD87_STAAU	2018-09-27 01:08:51.522093+00:00	hours		0.7488
54255	Limonene data for ART	2X.Mh	DH1 with two plasmid (medium + high copy) expression system for production of Limonene		EZrich (Teknova) 1% Glucose	1.2	Targeted Proteomics	55349	2X.Mh	Q9FD86_STAAU	2018-09-27 01:08:51.522093+00:00	hours		0.7816
54255	Limonene data for ART	2X.Mh	DH1 with two plasmid (medium + high copy) expression system for production of Limonene		EZrich (Teknova) 1% Glucose	1.2	Targeted Proteomics	55349	2X.Mh	KIME_YEAST	2018-09-27 01:08:51.522093+00:00	hours		0.401
54255	Limonene data for ART	2X.Mh	DH1 with two plasmid (medium + high copy) expression system for production of Limonene		EZrich (Teknova) 1% Glucose	1.2	Targeted Proteomics	55349	2X.Mh	ERG8_YEAST	2018-09-27 01:08:51.522093+00:00	hours		0.9413
54255	Limonene data for ART	B.Hm	DH1 with single plasmid (medium-copy) expression system for production of Limonene		EZrich (Teknova) 1% Glucose	2.5	Targeted Proteomics	55350	B.Hm	MVD1_YEAST	2018-09-27 01:08:51.522093+00:00	hours		0.686
54255	Limonene data for ART	B.Hm	DH1 with single plasmid (medium-copy) expression system for production of Limonene		EZrich (Teknova) 1% Glucose	2.5	Targeted Proteomics	55350	B.Hm	Q40322_MENSP	2018-09-27 01:08:51.522093+00:00	hours		2.329
54255	Limonene data for ART	B.Hm	DH1 with single plasmid (medium-copy) expression system for production of Limonene		EZrich (Teknova) 1% Glucose	2.5	Targeted Proteomics	55350	B.Hm	IDI_ECOLI	2018-09-27 01:08:51.522093+00:00	hours		1.0595
54255	Limonene data for ART	B.Hm	DH1 with single plasmid (medium-copy) expression system for production of Limonene		EZrich (Teknova) 1% Glucose	2.5	Targeted Proteomics	55350	B.Hm	ATOB_ECOLI	2018-09-27 01:08:51.522093+00:00	hours		0.1265
54255	Limonene data for ART	B.Hm	DH1 with single plasmid (medium-copy) expression system for production of Limonene		EZrich (Teknova) 1% Glucose	2.5	Targeted Proteomics	55350	B.Hm	Q8LKJ3_ABIGR	2018-09-27 01:08:51.522093+00:00	hours		0.329
54255	Limonene data for ART	B.Hm	DH1 with single plasmid (medium-copy) expression system for production of Limonene		EZrich (Teknova) 1% Glucose	2.5	Targeted Proteomics	55350	B.Hm	Q9FD87_STAAU	2018-09-27 01:08:51.522093+00:00	hours		0.2928
54255	Limonene data for ART	B.Hm	DH1 with single plasmid (medium-copy) expression system for production of Limonene		EZrich (Teknova) 1% Glucose	2.5	Targeted Proteomics	55350	B.Hm	Q9FD86_STAAU	2018-09-27 01:08:51.522093+00:00	hours		0.1761
54255	Limonene data for ART	B.Hm	DH1 with single plasmid (medium-copy) expression system for production of Limonene		EZrich (Teknova) 1% Glucose	2.5	Targeted Proteomics	55350	B.Hm	KIME_YEAST	2018-09-27 01:08:51.522093+00:00	hours		0.1254
54255	Limonene data for ART	B.Hm	DH1 with single plasmid (medium-copy) expression system for production of Limonene		EZrich (Teknova) 1% Glucose	2.5	Targeted Proteomics	55350	B.Hm	ERG8_YEAST	2018-09-27 01:08:51.522093+00:00	hours		0.239
54255	Limonene data for ART	B.Hl	DH1 with single plasmid (medium-copy) expression system for production of Limonene		EZrich (Teknova) 1% Glucose	2.5	Targeted Proteomics	55351	B.Hl	MVD1_YEAST	2018-09-27 01:08:51.522093+00:00	hours		0.6812
54255	Limonene data for ART	B.Hl	DH1 with single plasmid (medium-copy) expression system for production of Limonene		EZrich (Teknova) 1% Glucose	2.5	Targeted Proteomics	55351	B.Hl	Q40322_MENSP	2018-09-27 01:08:51.522093+00:00	hours		1.2332
54255	Limonene data for ART	B.Hl	DH1 with single plasmid (medium-copy) expression system for production of Limonene		EZrich (Teknova) 1% Glucose	2.5	Targeted Proteomics	55351	B.Hl	IDI_ECOLI	2018-09-27 01:08:51.522093+00:00	hours		0.7374
54255	Limonene data for ART	B.Hl	DH1 with single plasmid (medium-copy) expression system for production of Limonene		EZrich (Teknova) 1% Glucose	2.5	Targeted Proteomics	55351	B.Hl	ATOB_ECOLI	2018-09-27 01:08:51.522093+00:00	hours		0.0432
54255	Limonene data for ART	B.Hl	DH1 with single plasmid (medium-copy) expression system for production of Limonene		EZrich (Teknova) 1% Glucose	2.5	Targeted Proteomics	55351	B.Hl	Q8LKJ3_ABIGR	2018-09-27 01:08:51.522093+00:00	hours		0.1047
54255	Limonene data for ART	B.Hl	DH1 with single plasmid (medium-copy) expression system for production of Limonene		EZrich (Teknova) 1% Glucose	2.5	Targeted Proteomics	55351	B.Hl	Q9FD87_STAAU	2018-09-27 01:08:51.522093+00:00	hours		0.0893
54255	Limonene data for ART	B.Hl	DH1 with single plasmid (medium-copy) expression system for production of Limonene		EZrich (Teknova) 1% Glucose	2.5	Targeted Proteomics	55351	B.Hl	Q9FD86_STAAU	2018-09-27 01:08:51.522093+00:00	hours		0.0654
54255	Limonene data for ART	B.Hl	DH1 with single plasmid (medium-copy) expression system for production of Limonene		EZrich (Teknova) 1% Glucose	2.5	Targeted Proteomics	55351	B.Hl	KIME_YEAST	2018-09-27 01:08:51.522093+00:00	hours		0.1127
54255	Limonene data for ART	B.Hl	DH1 with single plasmid (medium-copy) expression system for production of Limonene		EZrich (Teknova) 1% Glucose	2.5	Targeted Proteomics	55351	B.Hl	ERG8_YEAST	2018-09-27 01:08:51.522093+00:00	hours		0.1939
54255	Limonene data for ART	2X.Hl	DH1 with two plasmid (medium + high copy) expression system for production of Limonene		EZrich (Teknova) 1% Glucose	2.5	Targeted Proteomics	55352	2X.Hl	MVD1_YEAST	2018-09-27 01:08:51.522093+00:00	hours		1.054
54255	Limonene data for ART	2X.Hl	DH1 with two plasmid (medium + high copy) expression system for production of Limonene		EZrich (Teknova) 1% Glucose	2.5	Targeted Proteomics	55352	2X.Hl	Q40322_MENSP	2018-09-27 01:08:51.522093+00:00	hours		1.4751
54255	Limonene data for ART	2X.Hl	DH1 with two plasmid (medium + high copy) expression system for production of Limonene		EZrich (Teknova) 1% Glucose	2.5	Targeted Proteomics	55352	2X.Hl	IDI_ECOLI	2018-09-27 01:08:51.522093+00:00	hours		1.0516
54255	Limonene data for ART	2X.Hl	DH1 with two plasmid (medium + high copy) expression system for production of Limonene		EZrich (Teknova) 1% Glucose	2.5	Targeted Proteomics	55352	2X.Hl	ATOB_ECOLI	2018-09-27 01:08:51.522093+00:00	hours		0.0219
54255	Limonene data for ART	2X.Hl	DH1 with two plasmid (medium + high copy) expression system for production of Limonene		EZrich (Teknova) 1% Glucose	2.5	Targeted Proteomics	55352	2X.Hl	Q8LKJ3_ABIGR	2018-09-27 01:08:51.522093+00:00	hours		0.0605
54255	Limonene data for ART	2X.Hl	DH1 with two plasmid (medium + high copy) expression system for production of Limonene		EZrich (Teknova) 1% Glucose	2.5	Targeted Proteomics	55352	2X.Hl	Q9FD87_STAAU	2018-09-27 01:08:51.522093+00:00	hours		0.0429
54255	Limonene data for ART	2X.Hl	DH1 with two plasmid (medium + high copy) expression system for production of Limonene		EZrich (Teknova) 1% Glucose	2.5	Targeted Proteomics	55352	2X.Hl	Q9FD86_STAAU	2018-09-27 01:08:51.522093+00:00	hours		0.028
54255	Limonene data for ART	2X.Hl	DH1 with two plasmid (medium + high copy) expression system for production of Limonene		EZrich (Teknova) 1% Glucose	2.5	Targeted Proteomics	55352	2X.Hl	KIME_YEAST	2018-09-27 01:08:51.522093+00:00	hours		0.2256
54255	Limonene data for ART	2X.Hl	DH1 with two plasmid (medium + high copy) expression system for production of Limonene		EZrich (Teknova) 1% Glucose	2.5	Targeted Proteomics	55352	2X.Hl	ERG8_YEAST	2018-09-27 01:08:51.522093+00:00	hours		0.3407
54255	Limonene data for ART	B.Hh	DH1 with single plasmid (medium-copy) expression system for production of Limonene		EZrich (Teknova) 1% Glucose	2.5	Targeted Proteomics	55353	B.Hh	MVD1_YEAST	2018-09-27 01:08:51.522093+00:00	hours		0.7032
54255	Limonene data for ART	B.Hh	DH1 with single plasmid (medium-copy) expression system for production of Limonene		EZrich (Teknova) 1% Glucose	2.5	Targeted Proteomics	55353	B.Hh	Q40322_MENSP	2018-09-27 01:08:51.522093+00:00	hours		2.0806
54255	Limonene data for ART	B.Hh	DH1 with single plasmid (medium-copy) expression system for production of Limonene		EZrich (Teknova) 1% Glucose	2.5	Targeted Proteomics	55353	B.Hh	IDI_ECOLI	2018-09-27 01:08:51.522093+00:00	hours		0.965
54255	Limonene data for ART	B.Hh	DH1 with single plasmid (medium-copy) expression system for production of Limonene		EZrich (Teknova) 1% Glucose	2.5	Targeted Proteomics	55353	B.Hh	ATOB_ECOLI	2018-09-27 01:08:51.522093+00:00	hours		0.1469
54255	Limonene data for ART	B.Hh	DH1 with single plasmid (medium-copy) expression system for production of Limonene		EZrich (Teknova) 1% Glucose	2.5	Targeted Proteomics	55353	B.Hh	Q8LKJ3_ABIGR	2018-09-27 01:08:51.522093+00:00	hours		0.3147
54255	Limonene data for ART	B.Hh	DH1 with single plasmid (medium-copy) expression system for production of Limonene		EZrich (Teknova) 1% Glucose	2.5	Targeted Proteomics	55353	B.Hh	Q9FD87_STAAU	2018-09-27 01:08:51.522093+00:00	hours		0.3008
54255	Limonene data for ART	B.Hh	DH1 with single plasmid (medium-copy) expression system for production of Limonene		EZrich (Teknova) 1% Glucose	2.5	Targeted Proteomics	55353	B.Hh	Q9FD86_STAAU	2018-09-27 01:08:51.522093+00:00	hours		0.2055
54255	Limonene data for ART	B.Hh	DH1 with single plasmid (medium-copy) expression system for production of Limonene		EZrich (Teknova) 1% Glucose	2.5	Targeted Proteomics	55353	B.Hh	KIME_YEAST	2018-09-27 01:08:51.522093+00:00	hours		0.1536
54255	Limonene data for ART	B.Hh	DH1 with single plasmid (medium-copy) expression system for production of Limonene		EZrich (Teknova) 1% Glucose	2.5	Targeted Proteomics	55353	B.Hh	ERG8_YEAST	2018-09-27 01:08:51.522093+00:00	hours		0.2486
54255	Limonene data for ART	A.Mh	DH1 with single plasmid (high-copy) expression system for production of Limonene		EZrich (Teknova) 1% Glucose	1.2	Targeted Proteomics	55354	A.Mh	MVD1_YEAST	2018-09-27 01:08:51.522093+00:00	hours		1.1407
54255	Limonene data for ART	A.Mh	DH1 with single plasmid (high-copy) expression system for production of Limonene		EZrich (Teknova) 1% Glucose	1.2	Targeted Proteomics	55354	A.Mh	Q40322_MENSP	2018-09-27 01:08:51.522093+00:00	hours		7.0333
54255	Limonene data for ART	A.Mh	DH1 with single plasmid (high-copy) expression system for production of Limonene		EZrich (Teknova) 1% Glucose	1.2	Targeted Proteomics	55354	A.Mh	IDI_ECOLI	2018-09-27 01:08:51.522093+00:00	hours		1.3889
54255	Limonene data for ART	A.Mh	DH1 with single plasmid (high-copy) expression system for production of Limonene		EZrich (Teknova) 1% Glucose	1.2	Targeted Proteomics	55354	A.Mh	ATOB_ECOLI	2018-09-27 01:08:51.522093+00:00	hours		1.5108
54255	Limonene data for ART	A.Mh	DH1 with single plasmid (high-copy) expression system for production of Limonene		EZrich (Teknova) 1% Glucose	1.2	Targeted Proteomics	55354	A.Mh	Q8LKJ3_ABIGR	2018-09-27 01:08:51.522093+00:00	hours		4.5267
54255	Limonene data for ART	A.Mh	DH1 with single plasmid (high-copy) expression system for production of Limonene		EZrich (Teknova) 1% Glucose	1.2	Targeted Proteomics	55354	A.Mh	Q9FD87_STAAU	2018-09-27 01:08:51.522093+00:00	hours		4.4721
54255	Limonene data for ART	A.Mh	DH1 with single plasmid (high-copy) expression system for production of Limonene		EZrich (Teknova) 1% Glucose	1.2	Targeted Proteomics	55354	A.Mh	Q9FD86_STAAU	2018-09-27 01:08:51.522093+00:00	hours		3.3262
54255	Limonene data for ART	A.Mh	DH1 with single plasmid (high-copy) expression system for production of Limonene		EZrich (Teknova) 1% Glucose	1.2	Targeted Proteomics	55354	A.Mh	KIME_YEAST	2018-09-27 01:08:51.522093+00:00	hours		0.3536
54255	Limonene data for ART	A.Mh	DH1 with single plasmid (high-copy) expression system for production of Limonene		EZrich (Teknova) 1% Glucose	1.2	Targeted Proteomics	55354	A.Mh	ERG8_YEAST	2018-09-27 01:08:51.522093+00:00	hours		1.3905
54255	Limonene data for ART	A.Mm	DH1 with single plasmid (high-copy) expression system for production of Limonene		EZrich (Teknova) 1% Glucose	1.2	Targeted Proteomics	55355	A.Mm	MVD1_YEAST	2018-09-27 01:08:51.522093+00:00	hours		1.2638
54255	Limonene data for ART	A.Mm	DH1 with single plasmid (high-copy) expression system for production of Limonene		EZrich (Teknova) 1% Glucose	1.2	Targeted Proteomics	55355	A.Mm	Q40322_MENSP	2018-09-27 01:08:51.522093+00:00	hours		6.7834
54255	Limonene data for ART	A.Mm	DH1 with single plasmid (high-copy) expression system for production of Limonene		EZrich (Teknova) 1% Glucose	1.2	Targeted Proteomics	55355	A.Mm	IDI_ECOLI	2018-09-27 01:08:51.522093+00:00	hours		1.7495
54255	Limonene data for ART	A.Mm	DH1 with single plasmid (high-copy) expression system for production of Limonene		EZrich (Teknova) 1% Glucose	1.2	Targeted Proteomics	55355	A.Mm	ATOB_ECOLI	2018-09-27 01:08:51.522093+00:00	hours		1.4896
54255	Limonene data for ART	A.Mm	DH1 with single plasmid (high-copy) expression system for production of Limonene		EZrich (Teknova) 1% Glucose	1.2	Targeted Proteomics	55355	A.Mm	Q8LKJ3_ABIGR	2018-09-27 01:08:51.522093+00:00	hours		3.7042
54255	Limonene data for ART	A.Mm	DH1 with single plasmid (high-copy) expression system for production of Limonene		EZrich (Teknova) 1% Glucose	1.2	Targeted Proteomics	55355	A.Mm	Q9FD87_STAAU	2018-09-27 01:08:51.522093+00:00	hours		5.1326
54255	Limonene data for ART	A.Mm	DH1 with single plasmid (high-copy) expression system for production of Limonene		EZrich (Teknova) 1% Glucose	1.2	Targeted Proteomics	55355	A.Mm	Q9FD86_STAAU	2018-09-27 01:08:51.522093+00:00	hours		3.977
54255	Limonene data for ART	A.Mm	DH1 with single plasmid (high-copy) expression system for production of Limonene		EZrich (Teknova) 1% Glucose	1.2	Targeted Proteomics	55355	A.Mm	KIME_YEAST	2018-09-27 01:08:51.522093+00:00	hours		0.3517
54255	Limonene data for ART	A.Mm	DH1 with single plasmid (high-copy) expression system for production of Limonene		EZrich (Teknova) 1% Glucose	1.2	Targeted Proteomics	55355	A.Mm	ERG8_YEAST	2018-09-27 01:08:51.522093+00:00	hours		1.181
54255	Limonene data for ART	A.Ml	DH1 with single plasmid (high-copy) expression system for production of Limonene		EZrich (Teknova) 1% Glucose	1.2	Targeted Proteomics	55356	A.Ml	MVD1_YEAST	2018-09-27 01:08:51.522093+00:00	hours		1.8479
54255	Limonene data for ART	A.Ml	DH1 with single plasmid (high-copy) expression system for production of Limonene		EZrich (Teknova) 1% Glucose	1.2	Targeted Proteomics	55356	A.Ml	Q40322_MENSP	2018-09-27 01:08:51.522093+00:00	hours		4.0326
54255	Limonene data for ART	A.Ml	DH1 with single plasmid (high-copy) expression system for production of Limonene		EZrich (Teknova) 1% Glucose	1.2	Targeted Proteomics	55356	A.Ml	IDI_ECOLI	2018-09-27 01:08:51.522093+00:00	hours		2.0545
54255	Limonene data for ART	A.Ml	DH1 with single plasmid (high-copy) expression system for production of Limonene		EZrich (Teknova) 1% Glucose	1.2	Targeted Proteomics	55356	A.Ml	ATOB_ECOLI	2018-09-27 01:08:51.522093+00:00	hours		1.2792
54255	Limonene data for ART	A.Ml	DH1 with single plasmid (high-copy) expression system for production of Limonene		EZrich (Teknova) 1% Glucose	1.2	Targeted Proteomics	55356	A.Ml	Q8LKJ3_ABIGR	2018-09-27 01:08:51.522093+00:00	hours		0.4769
54255	Limonene data for ART	A.Ml	DH1 with single plasmid (high-copy) expression system for production of Limonene		EZrich (Teknova) 1% Glucose	1.2	Targeted Proteomics	55356	A.Ml	Q9FD87_STAAU	2018-09-27 01:08:51.522093+00:00	hours		4.0922
54255	Limonene data for ART	A.Ml	DH1 with single plasmid (high-copy) expression system for production of Limonene		EZrich (Teknova) 1% Glucose	1.2	Targeted Proteomics	55356	A.Ml	Q9FD86_STAAU	2018-09-27 01:08:51.522093+00:00	hours		3.7169
54255	Limonene data for ART	A.Ml	DH1 with single plasmid (high-copy) expression system for production of Limonene		EZrich (Teknova) 1% Glucose	1.2	Targeted Proteomics	55356	A.Ml	KIME_YEAST	2018-09-27 01:08:51.522093+00:00	hours		0.2986
54255	Limonene data for ART	A.Ml	DH1 with single plasmid (high-copy) expression system for production of Limonene		EZrich (Teknova) 1% Glucose	1.2	Targeted Proteomics	55356	A.Ml	ERG8_YEAST	2018-09-27 01:08:51.522093+00:00	hours		0.7648
