# Supplementary material for: Multiomics Data Collection, Visualization, and Utilization for Guiding Metabolic Engineering
Source: Front Bioeng Biotechnol. 2021 Feb 9;9:612893. doi: 10.3389/fbioe.2021.612893 (PMC7902046; doi:10.3389/fbioe.2021.612893)
Supplement: Supplementary file 10 [file Data_Sheet_1.ZIP]

Archive with 10 entries (10 files):
- Input files/Screencast 6/EDD_experiment_description_file_BE_designs.csv
- Input files/Screencast 2/EDD_metabolomics_WTSM.csv
- Input files/Screencast 2/EDD_proteomics_BTSM.csv
- Input files/Screencast 4/MOstrains.csv
- Input files/Screencast 2/EDD_transcriptomics_BTSM.csv
- Input files/Screencast 6/EDD_isoprenol_production.csv
- Input files/Screencast 2/EDD_OD_WT.csv
- Input files/Screencast 2/EDD_external_metabolites_WT.csv
- Input files/Screencast 2/EDD_experiment_description_file_WT.csv
- Input files/Screencast 9/Limonene_data_for_ART - dashes removed.xlsx
