# Supplementary material for: Multiomics Data Collection, Visualization, and Utilization for Guiding Metabolic Engineering
Source: Front Bioeng Biotechnol. 2021 Feb 9;9:612893. doi: 10.3389/fbioe.2021.612893 (PMC7902046; doi:10.3389/fbioe.2021.612893)
Supplement: Supplementary file 10 [file Data_Sheet_1.ZIP › Input files/Screencast 2/EDD_experiment_description_file_WT.csv]

Line Name	Line Description	Part ID	Media	Shaking Speed	Starting OD	Culture Volume	Flask Volume	Growth Temperature	Replicate Count
WT	Wild type E. coli	ABFPUB_000310	M9	1	0.1	50	200	30	1
