# Supplementary material for: Multiomics Data Collection, Visualization, and Utilization for Guiding Metabolic Engineering
Source: Front Bioeng Biotechnol. 2021 Feb 9;9:612893. doi: 10.3389/fbioe.2021.612893 (PMC7902046; doi:10.3389/fbioe.2021.612893)
Supplement: Supplementary file 10 [file Data_Sheet_1.ZIP › Input files/Screencast 2/EDD_external_metabolites_WT.csv]

Line Name	Measurement Type	Time	Value	Units
WT	CID:5793	0.0	22.070668648116943	mM
WT	CID:5793	1.0	21.844411929032873	mM
WT	CID:5793	2.0	21.457564049054074	mM
WT	CID:5793	3.0	20.79614156025504	mM
WT	CID:5793	4.0	19.665258514668537	mM
WT	CID:5793	5.0	17.731703964509308	mM
WT	CID:5793	6.0	14.425762458858287	mM
WT	CID:5793	7.0	8.773349270988255	mM
WT	CID:5793	8.0	0.0	mM
WT	CID:5793	9.0	0.0	mM
WT	CID:12988	0.0	0.0026466270376611185	mM
WT	CID:12988	1.0	0.007171761419342546	mM
WT	CID:12988	2.0	0.01490871901891849	mM
WT	CID:12988	3.0	0.028137168794899123	mM
WT	CID:12988	4.0	0.05075482970662923	mM
WT	CID:12988	5.0	0.08942592070981384	mM
WT	CID:12988	6.0	0.15554475082283425	mM
WT	CID:12988	7.0	0.2685930145802349	mM
WT	CID:12988	8.0	0.46188000887093	mM
WT	CID:12988	9.0	0.46188000887093	mM
WT	CID:175	0.0	0.027404985374640336	mM
WT	CID:175	1.0	0.07426131978957667	mM
WT	CID:175	2.0	0.15437506715307664	mM
WT	CID:175	3.0	0.29135147806448525	mM
WT	CID:175	4.0	0.5255501988038839	mM
WT	CID:175	5.0	0.925977107576119	mM
WT	CID:175	6.0	1.6106166682136254	mM
WT	CID:175	7.0	2.7811956620857243	mM
WT	CID:175	8.0	4.782621316803507	mM
WT	CID:175	9.0	4.782621316803507	mM
WT	CID:283	0.0	0.0013233135188305593	mM
WT	CID:283	1.0	0.003585880709671273	mM
WT	CID:283	2.0	0.007454359509459245	mM
WT	CID:283	3.0	0.014068584397449561	mM
WT	CID:283	4.0	0.025377414853314614	mM
WT	CID:283	5.0	0.04471296035490692	mM
WT	CID:283	6.0	0.07777237541141713	mM
WT	CID:283	7.0	0.13429650729011744	mM
WT	CID:283	8.0	0.230940004435465	mM
WT	CID:283	9.0	0.230940004435465	mM
WT	CID:612	0.0	0.10253814350326079	mM
WT	CID:612	1.0	0.2778552063148141	mM
WT	CID:612	2.0	0.5776077809446901	mM
WT	CID:612	3.0	1.0901169717575665	mM
WT	CID:612	4.0	1.9663919161579595	mM
WT	CID:612	5.0	3.4646241273033525	mM
WT	CID:612	6.0	6.026262769213387	mM
WT	CID:612	7.0	10.406086192386267	mM
WT	CID:612	8.0	17.894594877541987	mM
WT	CID:612	9.0	17.894594877541987	mM
WT	CID:702	0.0	0.0	mM
WT	CID:702	1.0	0.0	mM
WT	CID:702	2.0	0.0	mM
WT	CID:702	3.0	0.0	mM
WT	CID:702	4.0	0.0	mM
WT	CID:702	5.0	0.0	mM
WT	CID:702	6.0	0.0	mM
WT	CID:702	7.0	0.0	mM
WT	CID:702	8.0	0.0	mM
WT	CID:702	9.0	0.0	mM
