# Supplementary material for: Multiomics Data Collection, Visualization, and Utilization for Guiding Metabolic Engineering
Source: Front Bioeng Biotechnol. 2021 Feb 9;9:612893. doi: 10.3389/fbioe.2021.612893 (PMC7902046; doi:10.3389/fbioe.2021.612893)
Supplement: Supplementary file 10 [file Data_Sheet_1.ZIP › Input files/Screencast 2/EDD_metabolomics_WTSM.csv]

Line Name	Measurement Type	Time	Value	Units
WT	CID:1549101	0.0	0.07958506936521938	mM
WT	CID:175	0.0	3.712638405521039	mM
WT	CID:164533	0.0	0.41645027331068324	mM
WT	CID:15938965	0.0	0.019946402973418608	mM
WT	CID:21604863	0.0	0.9588765953013125	mM
WT	CID:15939608	0.0	0.1445224938275108	mM
WT	CID:27284	0.0	0.006170397466970497	mM
WT	CID:1038	0.0	6.01470787338645	mM
WT	CID:16741146	0.0	7.34719741359819	mM
WT	CID:1778309	0.0	0.045058994389702206	mM
WT	CID:1549101	1.0	0.07958506936521938	mM
WT	CID:175	1.0	3.712638405521039	mM
WT	CID:164533	1.0	0.41645027331068324	mM
WT	CID:15938965	1.0	0.019946402973418608	mM
WT	CID:21604863	1.0	0.9588765953013125	mM
WT	CID:15939608	1.0	0.1445224938275108	mM
WT	CID:27284	1.0	0.006170397466970497	mM
WT	CID:1038	1.0	6.01470787338645	mM
WT	CID:16741146	1.0	7.34719741359819	mM
WT	CID:1778309	1.0	0.045058994389702206	mM
WT	CID:1549101	2.0	0.07958506936521938	mM
WT	CID:175	2.0	3.712638405521039	mM
WT	CID:164533	2.0	0.41645027331068324	mM
WT	CID:15938965	2.0	0.019946402973418608	mM
WT	CID:21604863	2.0	0.9588765953013125	mM
WT	CID:15939608	2.0	0.1445224938275108	mM
WT	CID:27284	2.0	0.006170397466970497	mM
WT	CID:1038	2.0	6.01470787338645	mM
WT	CID:16741146	2.0	7.34719741359819	mM
WT	CID:1778309	2.0	0.045058994389702206	mM
WT	CID:1549101	3.0	0.07958506936521938	mM
WT	CID:175	3.0	3.712638405521039	mM
WT	CID:164533	3.0	0.41645027331068324	mM
WT	CID:15938965	3.0	0.019946402973418608	mM
WT	CID:21604863	3.0	0.9588765953013125	mM
WT	CID:15939608	3.0	0.1445224938275108	mM
WT	CID:27284	3.0	0.006170397466970497	mM
WT	CID:1038	3.0	6.01470787338645	mM
WT	CID:16741146	3.0	7.34719741359819	mM
WT	CID:1778309	3.0	0.045058994389702206	mM
WT	CID:1549101	4.0	0.07958506936521938	mM
WT	CID:175	4.0	3.712638405521039	mM
WT	CID:164533	4.0	0.41645027331068324	mM
WT	CID:15938965	4.0	0.019946402973418608	mM
WT	CID:21604863	4.0	0.9588765953013125	mM
WT	CID:15939608	4.0	0.1445224938275108	mM
WT	CID:27284	4.0	0.006170397466970497	mM
WT	CID:1038	4.0	6.01470787338645	mM
WT	CID:16741146	4.0	7.34719741359819	mM
WT	CID:1778309	4.0	0.045058994389702206	mM
WT	CID:1549101	5.0	0.07958506936521938	mM
WT	CID:175	5.0	3.712638405521039	mM
WT	CID:164533	5.0	0.41645027331068324	mM
WT	CID:15938965	5.0	0.019946402973418608	mM
WT	CID:21604863	5.0	0.9588765953013125	mM
WT	CID:15939608	5.0	0.1445224938275108	mM
WT	CID:27284	5.0	0.006170397466970497	mM
WT	CID:1038	5.0	6.01470787338645	mM
WT	CID:16741146	5.0	7.34719741359819	mM
WT	CID:1778309	5.0	0.045058994389702206	mM
WT	CID:1549101	6.0	0.07958506936521938	mM
WT	CID:175	6.0	3.712638405521039	mM
WT	CID:164533	6.0	0.41645027331068324	mM
WT	CID:15938965	6.0	0.019946402973418608	mM
WT	CID:21604863	6.0	0.9588765953013125	mM
WT	CID:15939608	6.0	0.1445224938275108	mM
WT	CID:27284	6.0	0.006170397466970497	mM
WT	CID:1038	6.0	6.01470787338645	mM
WT	CID:16741146	6.0	7.34719741359819	mM
WT	CID:1778309	6.0	0.045058994389702206	mM
WT	CID:1549101	7.0	0.07958506936521938	mM
WT	CID:175	7.0	3.712638405521039	mM
WT	CID:164533	7.0	0.41645027331068324	mM
WT	CID:15938965	7.0	0.019946402973418608	mM
WT	CID:21604863	7.0	0.9588765953013125	mM
WT	CID:15939608	7.0	0.1445224938275108	mM
WT	CID:27284	7.0	0.006170397466970497	mM
WT	CID:1038	7.0	6.01470787338645	mM
WT	CID:16741146	7.0	7.34719741359819	mM
WT	CID:1778309	7.0	0.045058994389702206	mM
WT	CID:1549101	8.0	0.07958506936521938	mM
WT	CID:175	8.0	3.712638405521039	mM
WT	CID:164533	8.0	0.41645027331068324	mM
WT	CID:15938965	8.0	0.019946402973418608	mM
WT	CID:21604863	8.0	0.9588765953013125	mM
WT	CID:15939608	8.0	0.1445224938275108	mM
WT	CID:27284	8.0	0.006170397466970497	mM
WT	CID:1038	8.0	6.01470787338645	mM
WT	CID:16741146	8.0	7.34719741359819	mM
WT	CID:1778309	8.0	0.045058994389702206	mM
