# Supplementary material for: Multiomics Data Collection, Visualization, and Utilization for Guiding Metabolic Engineering
Source: Front Bioeng Biotechnol. 2021 Feb 9;9:612893. doi: 10.3389/fbioe.2021.612893 (PMC7902046; doi:10.3389/fbioe.2021.612893)
Supplement: Supplementary file 10 [file Data_Sheet_1.ZIP › Input files/Screencast 2/EDD_OD_WT.csv]

Line Name	Measurement Type	Time	Value	Units
WT	Optical Density	0.0	0.01	n/a
WT	Optical Density	1.0	0.017097741076809926	n/a
WT	Optical Density	2.0	0.029233274992963344	n/a
WT	Optical Density	3.0	0.04998229666568697	n/a
WT	Optical Density	4.0	0.08545843668142158	n/a
WT	Optical Density	5.0	0.14611462232079017	n/a
WT	Optical Density	6.0	0.24982299799767424	n/a
WT	Optical Density	7.0	0.42714089347966383	n/a
WT	Optical Density	8.0	0.7303144400032541	n/a
WT	Optical Density	9.0	1.2486727199831074	n/a
