# Supplementary material for: Multiomics Data Collection, Visualization, and Utilization for Guiding Metabolic Engineering
Source: Front Bioeng Biotechnol. 2021 Feb 9;9:612893. doi: 10.3389/fbioe.2021.612893 (PMC7902046; doi:10.3389/fbioe.2021.612893)
Supplement: Supplementary file 10 [file Data_Sheet_1.ZIP › Input files/Screencast 2/EDD_proteomics_BTSM.csv]

Line Name	Measurement Type	Time	Value	Units
Strain 97	P17115	0.0	0.02560827244516954	proteins/cell
Strain 97	P45395	0.0	0.022712917393722568	proteins/cell
Strain 97	P0A6A8	0.0	0.02860675340826319	proteins/cell
Strain 97	P76461	0.0	0.22709694229984384	proteins/cell
Strain 97	P77580	0.0	1.0238228149474873	proteins/cell
Strain 97	P24182	0.0	0.054959184405231	proteins/cell
Strain 97	P0A9Q5	0.0	0.054963938622140475	proteins/cell
Strain 97	P0ABD5	0.0	0.04983172191753955	proteins/cell
Strain 97	P00893	0.0	0.5675995171715277	proteins/cell
Strain 97	P17115	1.0	0.02650393786085405	proteins/cell
Strain 97	P45395	1.0	0.02361204601416159	proteins/cell
Strain 97	P0A6A8	1.0	0.02662791546893982	proteins/cell
Strain 97	P76461	1.0	0.22024943193687424	proteins/cell
Strain 97	P77580	1.0	1.0384462694940289	proteins/cell
Strain 97	P24182	1.0	0.05271843869922081	proteins/cell
Strain 97	P0A9Q5	1.0	0.05681205812186566	proteins/cell
Strain 97	P0ABD5	1.0	0.053859787523472716	proteins/cell
Strain 97	P00893	1.0	0.6045537518578602	proteins/cell
Strain 97	P17115	2.0	0.02566480276759429	proteins/cell
Strain 97	P45395	2.0	0.025473298526103975	proteins/cell
Strain 97	P0A6A8	2.0	0.02365935572260352	proteins/cell
Strain 97	P76461	2.0	0.23483532250216568	proteins/cell
Strain 97	P77580	2.0	1.0796305586117023	proteins/cell
Strain 97	P24182	2.0	0.050836715001894364	proteins/cell
Strain 97	P0A9Q5	2.0	0.05015677795197144	proteins/cell
Strain 97	P0ABD5	2.0	0.05024238395351092	proteins/cell
Strain 97	P00893	2.0	0.5857464455153018	proteins/cell
Strain 97	P17115	3.0	0.025357872389344963	proteins/cell
Strain 97	P45395	3.0	0.025344150237529072	proteins/cell
Strain 97	P0A6A8	3.0	0.027665497003287243	proteins/cell
Strain 97	P76461	3.0	0.22021185000423188	proteins/cell
Strain 97	P77580	3.0	1.1663710998583148	proteins/cell
Strain 97	P24182	3.0	0.04726036876743952	proteins/cell
Strain 97	P0A9Q5	3.0	0.053380923172352185	proteins/cell
Strain 97	P0ABD5	3.0	0.05451788378648832	proteins/cell
Strain 97	P00893	3.0	0.5114454873195751	proteins/cell
Strain 97	P17115	4.0	0.024825351863162693	proteins/cell
Strain 97	P45395	4.0	0.02724286656888837	proteins/cell
Strain 97	P0A6A8	4.0	0.0251157799437439	proteins/cell
Strain 97	P76461	4.0	0.2504045645468539	proteins/cell
Strain 97	P77580	4.0	1.0907190347452504	proteins/cell
Strain 97	P24182	4.0	0.050322274558387094	proteins/cell
Strain 97	P0A9Q5	4.0	0.05320975445965833	proteins/cell
Strain 97	P0ABD5	4.0	0.05034791501112199	proteins/cell
Strain 97	P00893	4.0	0.5486895231477247	proteins/cell
Strain 97	P17115	5.0	0.026767049551279627	proteins/cell
Strain 97	P45395	5.0	0.02628053326930309	proteins/cell
Strain 97	P0A6A8	5.0	0.026622410260688917	proteins/cell
Strain 97	P76461	5.0	0.23297788289807628	proteins/cell
Strain 97	P77580	5.0	1.0556295759738816	proteins/cell
Strain 97	P24182	5.0	0.05496101964965841	proteins/cell
Strain 97	P0A9Q5	5.0	0.05108494102950039	proteins/cell
Strain 97	P0ABD5	5.0	0.0508867400413172	proteins/cell
Strain 97	P00893	5.0	0.5979312545926115	proteins/cell
Strain 97	P17115	6.0	0.025990505630170812	proteins/cell
Strain 97	P45395	6.0	0.026865636529804945	proteins/cell
Strain 97	P0A6A8	6.0	0.02505698608380825	proteins/cell
Strain 97	P76461	6.0	0.22544459305227435	proteins/cell
Strain 97	P77580	6.0	1.0161021149572063	proteins/cell
Strain 97	P24182	6.0	0.050738637434362674	proteins/cell
Strain 97	P0A9Q5	6.0	0.05185356670864029	proteins/cell
Strain 97	P0ABD5	6.0	0.052010598465144865	proteins/cell
Strain 97	P00893	6.0	0.6033257898720162	proteins/cell
Strain 97	P17115	7.0	0.023383167936996026	proteins/cell
Strain 97	P45395	7.0	0.027320407046341207	proteins/cell
Strain 97	P0A6A8	7.0	0.02652950660806897	proteins/cell
Strain 97	P76461	7.0	0.23830882733964545	proteins/cell
Strain 97	P77580	7.0	1.1195766280064843	proteins/cell
Strain 97	P24182	7.0	0.050295584450351115	proteins/cell
Strain 97	P0A9Q5	7.0	0.055741508585657004	proteins/cell
Strain 97	P0ABD5	7.0	0.05024503961880375	proteins/cell
Strain 97	P00893	7.0	0.5749318356920358	proteins/cell
Strain 97	P17115	8.0	0.024821851173101532	proteins/cell
Strain 97	P45395	8.0	0.027473423562417547	proteins/cell
Strain 97	P0A6A8	8.0	0.027183099586549995	proteins/cell
Strain 97	P76461	8.0	0.22576571646106372	proteins/cell
Strain 97	P77580	8.0	1.0232457232893954	proteins/cell
Strain 97	P24182	8.0	0.05701132044598636	proteins/cell
Strain 97	P0A9Q5	8.0	0.05603954335215082	proteins/cell
Strain 97	P0ABD5	8.0	0.05093723104502417	proteins/cell
Strain 97	P00893	8.0	0.5483368075516342	proteins/cell
