# Supplementary material for: Multiomics Data Collection, Visualization, and Utilization for Guiding Metabolic Engineering
Source: Front Bioeng Biotechnol. 2021 Feb 9;9:612893. doi: 10.3389/fbioe.2021.612893 (PMC7902046; doi:10.3389/fbioe.2021.612893)
Supplement: Supplementary file 10 [file Data_Sheet_1.ZIP › Input files/Screencast 2/EDD_transcriptomics_BTSM.csv]

Line Name	Measurement Type	Time	Value	Units
Strain 97	b0180	0.0	2.1234844646216373e-05	FPKM
Strain 97	b2708	0.0	0.4183764998401797	FPKM
Strain 97	b3197	0.0	0.39806352719175686	FPKM
Strain 97	b1094	0.0	0.47339636751779285	FPKM
Strain 97	b2224	0.0	3.7083997082331734	FPKM
Strain 97	b3256	0.0	0.9304375711989511	FPKM
Strain 97	b2316	0.0	0.8207498552703302	FPKM
Strain 97	b3255	0.0	0.8678522583467934	FPKM
Strain 97	b0185	0.0	0.8166394162926408	FPKM
Strain 97	b1101	0.0	209.08709914012587	FPKM
Strain 97	b0180	1.0	2.3652105202829653e-05	FPKM
Strain 97	b2708	1.0	0.36203669871506733	FPKM
Strain 97	b3197	1.0	0.37051537281652486	FPKM
Strain 97	b1094	1.0	0.4219964781104044	FPKM
Strain 97	b2224	1.0	3.1465153195948137	FPKM
Strain 97	b3256	1.0	0.8323050430086275	FPKM
Strain 97	b2316	1.0	0.9265966158277108	FPKM
Strain 97	b3255	1.0	0.8061331791638531	FPKM
Strain 97	b0185	1.0	0.8948491769790122	FPKM
Strain 97	b1101	1.0	210.60206547829276	FPKM
Strain 97	b0180	2.0	2.5018502200495995e-05	FPKM
Strain 97	b2708	2.0	0.43085243588233113	FPKM
Strain 97	b3197	2.0	0.4125072338478989	FPKM
Strain 97	b1094	2.0	0.38175759016268096	FPKM
Strain 97	b2224	2.0	3.7998367269395232	FPKM
Strain 97	b3256	2.0	0.8618781489933519	FPKM
Strain 97	b2316	2.0	0.7632846675157177	FPKM
Strain 97	b3255	2.0	0.9299644813666841	FPKM
Strain 97	b0185	2.0	0.9209085203241971	FPKM
Strain 97	b1101	2.0	207.57931876465486	FPKM
Strain 97	b0180	3.0	2.2171483790653868e-05	FPKM
Strain 97	b2708	3.0	0.4291301690931789	FPKM
Strain 97	b3197	3.0	0.41644463291520806	FPKM
Strain 97	b1094	3.0	0.44731204953349996	FPKM
Strain 97	b2224	3.0	3.7281387402852353	FPKM
Strain 97	b3256	3.0	0.823428820548034	FPKM
Strain 97	b2316	3.0	0.9053839404042457	FPKM
Strain 97	b3255	3.0	0.841848981995411	FPKM
Strain 97	b0185	3.0	0.9350702022056028	FPKM
Strain 97	b1101	3.0	195.46160123192502	FPKM
Strain 97	b0180	4.0	2.504933680072206e-05	FPKM
Strain 97	b2708	4.0	0.42580497381358634	FPKM
Strain 97	b3197	4.0	0.44086669952772256	FPKM
Strain 97	b1094	4.0	0.44472342524039216	FPKM
Strain 97	b2224	4.0	4.075217669501115	FPKM
Strain 97	b3256	4.0	0.8579411813720345	FPKM
Strain 97	b2316	4.0	0.8336800185576845	FPKM
Strain 97	b3255	4.0	0.835640605806004	FPKM
Strain 97	b0185	4.0	0.8495342054144613	FPKM
Strain 97	b1101	4.0	209.3851012250272	FPKM
Strain 97	b0180	5.0	2.5329585173802424e-05	FPKM
Strain 97	b2708	5.0	0.43623197936923686	FPKM
Strain 97	b3197	5.0	0.41805590265843295	FPKM
Strain 97	b1094	5.0	0.45162589795658725	FPKM
Strain 97	b2224	5.0	3.7906011985295818	FPKM
Strain 97	b3256	5.0	0.9117336179980228	FPKM
Strain 97	b2316	5.0	0.8963409921811347	FPKM
Strain 97	b3255	5.0	0.8481068996564098	FPKM
Strain 97	b0185	5.0	0.8704274454042257	FPKM
Strain 97	b1101	5.0	209.9436093982569	FPKM
Strain 97	b0180	6.0	2.328539039666397e-05	FPKM
Strain 97	b2708	6.0	0.3903706018429401	FPKM
Strain 97	b3197	6.0	0.4278883314886165	FPKM
Strain 97	b1094	6.0	0.3737789894397795	FPKM
Strain 97	b2224	6.0	3.673055597595786	FPKM
Strain 97	b3256	6.0	0.8190755767403031	FPKM
Strain 97	b2316	6.0	0.8883428032911345	FPKM
Strain 97	b3255	6.0	0.8464659589907546	FPKM
Strain 97	b0185	6.0	0.8287527683706284	FPKM
Strain 97	b1101	6.0	217.67613983034497	FPKM
Strain 97	b0180	7.0	2.1471451180321722e-05	FPKM
Strain 97	b2708	7.0	0.35757141470070297	FPKM
Strain 97	b3197	7.0	0.4761367727792813	FPKM
Strain 97	b1094	7.0	0.42433649388066874	FPKM
Strain 97	b2224	7.0	3.8675913363410106	FPKM
Strain 97	b3256	7.0	0.7915586225253991	FPKM
Strain 97	b2316	7.0	0.9264025693934625	FPKM
Strain 97	b3255	7.0	0.869934684147248	FPKM
Strain 97	b0185	7.0	0.8470679593515066	FPKM
Strain 97	b1101	7.0	199.3964456707383	FPKM
Strain 97	b0180	8.0	2.303490730924306e-05	FPKM
Strain 97	b2708	8.0	0.4100278344325124	FPKM
Strain 97	b3197	8.0	0.45766807532307835	FPKM
Strain 97	b1094	8.0	0.4650329049113448	FPKM
Strain 97	b2224	8.0	3.5108071329709545	FPKM
Strain 97	b3256	8.0	0.9287734150260629	FPKM
Strain 97	b2316	8.0	0.9281816842961017	FPKM
Strain 97	b3255	8.0	0.8427472851264424	FPKM
Strain 97	b0185	8.0	0.8311653467587775	FPKM
Strain 97	b1101	8.0	197.12503014564544	FPKM
