# Supplementary material for: Multiomics Data Collection, Visualization, and Utilization for Guiding Metabolic Engineering
Source: Front Bioeng Biotechnol. 2021 Feb 9;9:612893. doi: 10.3389/fbioe.2021.612893 (PMC7902046; doi:10.3389/fbioe.2021.612893)
Supplement: Supplementary file 10 [file Data_Sheet_1.ZIP › Input files/Screencast 4/MOstrains.csv]

Principal Investigator*	Principal Investigator Email	Funding Source	Intellectual Property	BioSafety Level*	Name*	Alias	Keywords	Summary*	Notes	References	Links	Status*	Creator*	Creator Email*	Host	Genotype or Phenotype	Selection Markers*	Sequence Trace File(s)	Sequence File	Attachment File
Hector Garcia Martin	hgmartin@lbl.gov			1	Strain 1			ACCOAC_1_MDH_1_PTAr_2_CS_0_ACACT1r_2_PPC_0_PPCK_0_PFL_0				Complete	Hector Garcia Martin	hgmartin@lbl.gov
Hector Garcia Martin	hgmartin@lbl.gov			1	Strain 2			ACCOAC_1_MDH_2_PTAr_2_CS_2_ACACT1r_2_PPC_1_PPCK_1_PFL_0				Complete	Hector Garcia Martin	hgmartin@lbl.gov
Hector Garcia Martin	hgmartin@lbl.gov			1	Strain 3			ACCOAC_1_MDH_0_PTAr_0_CS_2_ACACT1r_1_PPC_1_PPCK_2_PFL_0				Complete	Hector Garcia Martin	hgmartin@lbl.gov
Hector Garcia Martin	hgmartin@lbl.gov			1	Strain 4			ACCOAC_1_MDH_1_PTAr_1_CS_1_ACACT1r_2_PPC_2_PPCK_1_PFL_0				Complete	Hector Garcia Martin	hgmartin@lbl.gov
Hector Garcia Martin	hgmartin@lbl.gov			1	Strain 5			ACCOAC_2_MDH_0_PTAr_2_CS_1_ACACT1r_1_PPC_0_PPCK_1_PFL_1				Complete	Hector Garcia Martin	hgmartin@lbl.gov
Hector Garcia Martin	hgmartin@lbl.gov			1	Strain 6			ACCOAC_2_MDH_0_PTAr_0_CS_1_ACACT1r_2_PPC_0_PPCK_1_PFL_0				Complete	Hector Garcia Martin	hgmartin@lbl.gov
Hector Garcia Martin	hgmartin@lbl.gov			1	Strain 7			ACCOAC_2_MDH_1_PTAr_2_CS_2_ACACT1r_2_PPC_2_PPCK_0_PFL_2				Complete	Hector Garcia Martin	hgmartin@lbl.gov
Hector Garcia Martin	hgmartin@lbl.gov			1	Strain 8			ACCOAC_1_MDH_1_PTAr_0_CS_1_ACACT1r_2_PPC_0_PPCK_0_PFL_0				Complete	Hector Garcia Martin	hgmartin@lbl.gov
Hector Garcia Martin	hgmartin@lbl.gov			1	Strain 9			ACCOAC_2_MDH_1_PTAr_2_CS_2_ACACT1r_0_PPC_0_PPCK_0_PFL_2				Complete	Hector Garcia Martin	hgmartin@lbl.gov
Hector Garcia Martin	hgmartin@lbl.gov			1	Strain 10			ACCOAC_2_MDH_2_PTAr_2_CS_0_ACACT1r_1_PPC_0_PPCK_2_PFL_0				Complete	Hector Garcia Martin	hgmartin@lbl.gov
Hector Garcia Martin	hgmartin@lbl.gov			1	Strain 11			ACCOAC_0_MDH_1_PTAr_2_CS_1_ACACT1r_1_PPC_2_PPCK_0_PFL_0				Complete	Hector Garcia Martin	hgmartin@lbl.gov
Hector Garcia Martin	hgmartin@lbl.gov			1	Strain 12			ACCOAC_1_MDH_2_PTAr_1_CS_0_ACACT1r_2_PPC_2_PPCK_2_PFL_1				Complete	Hector Garcia Martin	hgmartin@lbl.gov
Hector Garcia Martin	hgmartin@lbl.gov			1	Strain 13			ACCOAC_1_MDH_2_PTAr_1_CS_2_ACACT1r_0_PPC_0_PPCK_2_PFL_2				Complete	Hector Garcia Martin	hgmartin@lbl.gov
Hector Garcia Martin	hgmartin@lbl.gov			1	Strain 14			ACCOAC_2_MDH_2_PTAr_1_CS_1_ACACT1r_0_PPC_2_PPCK_2_PFL_2				Complete	Hector Garcia Martin	hgmartin@lbl.gov
Hector Garcia Martin	hgmartin@lbl.gov			1	Strain 15			ACCOAC_1_MDH_1_PTAr_2_CS_0_ACACT1r_2_PPC_1_PPCK_2_PFL_1				Complete	Hector Garcia Martin	hgmartin@lbl.gov
Hector Garcia Martin	hgmartin@lbl.gov			1	Strain 16			ACCOAC_1_MDH_1_PTAr_2_CS_0_ACACT1r_2_PPC_2_PPCK_0_PFL_0				Complete	Hector Garcia Martin	hgmartin@lbl.gov
Hector Garcia Martin	hgmartin@lbl.gov			1	Strain 17			ACCOAC_2_MDH_2_PTAr_0_CS_2_ACACT1r_2_PPC_2_PPCK_0_PFL_2				Complete	Hector Garcia Martin	hgmartin@lbl.gov
Hector Garcia Martin	hgmartin@lbl.gov			1	Strain 18			ACCOAC_2_MDH_2_PTAr_1_CS_2_ACACT1r_0_PPC_2_PPCK_1_PFL_2				Complete	Hector Garcia Martin	hgmartin@lbl.gov
Hector Garcia Martin	hgmartin@lbl.gov			1	Strain 19			ACCOAC_2_MDH_0_PTAr_1_CS_0_ACACT1r_1_PPC_0_PPCK_0_PFL_1				Complete	Hector Garcia Martin	hgmartin@lbl.gov
Hector Garcia Martin	hgmartin@lbl.gov			1	Strain 20			ACCOAC_1_MDH_1_PTAr_1_CS_0_ACACT1r_1_PPC_2_PPCK_2_PFL_0				Complete	Hector Garcia Martin	hgmartin@lbl.gov
Hector Garcia Martin	hgmartin@lbl.gov			1	Strain 21			ACCOAC_0_MDH_2_PTAr_1_CS_2_ACACT1r_0_PPC_1_PPCK_1_PFL_2				Complete	Hector Garcia Martin	hgmartin@lbl.gov
Hector Garcia Martin	hgmartin@lbl.gov			1	Strain 22			ACCOAC_2_MDH_2_PTAr_1_CS_1_ACACT1r_1_PPC_0_PPCK_2_PFL_1				Complete	Hector Garcia Martin	hgmartin@lbl.gov
Hector Garcia Martin	hgmartin@lbl.gov			1	Strain 23			ACCOAC_0_MDH_1_PTAr_2_CS_0_ACACT1r_2_PPC_1_PPCK_1_PFL_2				Complete	Hector Garcia Martin	hgmartin@lbl.gov
Hector Garcia Martin	hgmartin@lbl.gov			1	Strain 24			ACCOAC_0_MDH_0_PTAr_0_CS_1_ACACT1r_2_PPC_2_PPCK_1_PFL_1				Complete	Hector Garcia Martin	hgmartin@lbl.gov
Hector Garcia Martin	hgmartin@lbl.gov			1	Strain 25			ACCOAC_0_MDH_0_PTAr_2_CS_2_ACACT1r_2_PPC_2_PPCK_0_PFL_2				Complete	Hector Garcia Martin	hgmartin@lbl.gov
Hector Garcia Martin	hgmartin@lbl.gov			1	Strain 26			ACCOAC_1_MDH_2_PTAr_0_CS_0_ACACT1r_1_PPC_2_PPCK_0_PFL_0				Complete	Hector Garcia Martin	hgmartin@lbl.gov
Hector Garcia Martin	hgmartin@lbl.gov			1	Strain 27			ACCOAC_1_MDH_1_PTAr_1_CS_0_ACACT1r_0_PPC_1_PPCK_0_PFL_1				Complete	Hector Garcia Martin	hgmartin@lbl.gov
Hector Garcia Martin	hgmartin@lbl.gov			1	Strain 28			ACCOAC_0_MDH_0_PTAr_0_CS_0_ACACT1r_2_PPC_0_PPCK_0_PFL_0				Complete	Hector Garcia Martin	hgmartin@lbl.gov
Hector Garcia Martin	hgmartin@lbl.gov			1	Strain 29			ACCOAC_0_MDH_0_PTAr_0_CS_0_ACACT1r_0_PPC_0_PPCK_2_PFL_0				Complete	Hector Garcia Martin	hgmartin@lbl.gov
Hector Garcia Martin	hgmartin@lbl.gov			1	Strain 30			ACCOAC_1_MDH_0_PTAr_0_CS_1_ACACT1r_2_PPC_0_PPCK_1_PFL_1				Complete	Hector Garcia Martin	hgmartin@lbl.gov
Hector Garcia Martin	hgmartin@lbl.gov			1	Strain 31			ACCOAC_0_MDH_2_PTAr_1_CS_0_ACACT1r_0_PPC_2_PPCK_1_PFL_1				Complete	Hector Garcia Martin	hgmartin@lbl.gov
Hector Garcia Martin	hgmartin@lbl.gov			1	Strain 32			ACCOAC_2_MDH_2_PTAr_0_CS_0_ACACT1r_2_PPC_2_PPCK_0_PFL_1				Complete	Hector Garcia Martin	hgmartin@lbl.gov
Hector Garcia Martin	hgmartin@lbl.gov			1	Strain 33			ACCOAC_1_MDH_0_PTAr_0_CS_2_ACACT1r_0_PPC_0_PPCK_1_PFL_0				Complete	Hector Garcia Martin	hgmartin@lbl.gov
Hector Garcia Martin	hgmartin@lbl.gov			1	Strain 34			ACCOAC_0_MDH_0_PTAr_0_CS_2_ACACT1r_1_PPC_2_PPCK_2_PFL_2				Complete	Hector Garcia Martin	hgmartin@lbl.gov
Hector Garcia Martin	hgmartin@lbl.gov			1	Strain 35			ACCOAC_0_MDH_2_PTAr_2_CS_1_ACACT1r_0_PPC_1_PPCK_1_PFL_2				Complete	Hector Garcia Martin	hgmartin@lbl.gov
Hector Garcia Martin	hgmartin@lbl.gov			1	Strain 36			ACCOAC_2_MDH_0_PTAr_1_CS_1_ACACT1r_1_PPC_1_PPCK_1_PFL_2				Complete	Hector Garcia Martin	hgmartin@lbl.gov
Hector Garcia Martin	hgmartin@lbl.gov			1	Strain 37			ACCOAC_2_MDH_0_PTAr_2_CS_0_ACACT1r_2_PPC_0_PPCK_2_PFL_2				Complete	Hector Garcia Martin	hgmartin@lbl.gov
Hector Garcia Martin	hgmartin@lbl.gov			1	Strain 38			ACCOAC_1_MDH_0_PTAr_2_CS_2_ACACT1r_1_PPC_2_PPCK_2_PFL_2				Complete	Hector Garcia Martin	hgmartin@lbl.gov
Hector Garcia Martin	hgmartin@lbl.gov			1	Strain 39			ACCOAC_2_MDH_0_PTAr_2_CS_1_ACACT1r_1_PPC_0_PPCK_0_PFL_1				Complete	Hector Garcia Martin	hgmartin@lbl.gov
Hector Garcia Martin	hgmartin@lbl.gov			1	Strain 40			ACCOAC_2_MDH_1_PTAr_1_CS_2_ACACT1r_1_PPC_0_PPCK_1_PFL_1				Complete	Hector Garcia Martin	hgmartin@lbl.gov
Hector Garcia Martin	hgmartin@lbl.gov			1	Strain 41			ACCOAC_1_MDH_2_PTAr_1_CS_2_ACACT1r_1_PPC_1_PPCK_1_PFL_2				Complete	Hector Garcia Martin	hgmartin@lbl.gov
Hector Garcia Martin	hgmartin@lbl.gov			1	Strain 42			ACCOAC_2_MDH_1_PTAr_2_CS_0_ACACT1r_0_PPC_2_PPCK_0_PFL_2				Complete	Hector Garcia Martin	hgmartin@lbl.gov
Hector Garcia Martin	hgmartin@lbl.gov			1	Strain 43			ACCOAC_0_MDH_1_PTAr_1_CS_1_ACACT1r_0_PPC_2_PPCK_1_PFL_2				Complete	Hector Garcia Martin	hgmartin@lbl.gov
Hector Garcia Martin	hgmartin@lbl.gov			1	Strain 44			ACCOAC_1_MDH_0_PTAr_2_CS_2_ACACT1r_0_PPC_0_PPCK_2_PFL_2				Complete	Hector Garcia Martin	hgmartin@lbl.gov
Hector Garcia Martin	hgmartin@lbl.gov			1	Strain 45			ACCOAC_0_MDH_1_PTAr_0_CS_1_ACACT1r_1_PPC_1_PPCK_2_PFL_0				Complete	Hector Garcia Martin	hgmartin@lbl.gov
Hector Garcia Martin	hgmartin@lbl.gov			1	Strain 46			ACCOAC_2_MDH_2_PTAr_2_CS_2_ACACT1r_2_PPC_1_PPCK_1_PFL_1				Complete	Hector Garcia Martin	hgmartin@lbl.gov
Hector Garcia Martin	hgmartin@lbl.gov			1	Strain 47			ACCOAC_0_MDH_0_PTAr_2_CS_2_ACACT1r_0_PPC_0_PPCK_1_PFL_1				Complete	Hector Garcia Martin	hgmartin@lbl.gov
Hector Garcia Martin	hgmartin@lbl.gov			1	Strain 48			ACCOAC_2_MDH_1_PTAr_1_CS_2_ACACT1r_1_PPC_2_PPCK_1_PFL_1				Complete	Hector Garcia Martin	hgmartin@lbl.gov
Hector Garcia Martin	hgmartin@lbl.gov			1	Strain 49			ACCOAC_1_MDH_2_PTAr_1_CS_2_ACACT1r_2_PPC_1_PPCK_0_PFL_1				Complete	Hector Garcia Martin	hgmartin@lbl.gov
Hector Garcia Martin	hgmartin@lbl.gov			1	Strain 50			ACCOAC_0_MDH_1_PTAr_1_CS_1_ACACT1r_2_PPC_0_PPCK_1_PFL_0				Complete	Hector Garcia Martin	hgmartin@lbl.gov
Hector Garcia Martin	hgmartin@lbl.gov			1	Strain 51			ACCOAC_2_MDH_1_PTAr_2_CS_0_ACACT1r_0_PPC_0_PPCK_2_PFL_0				Complete	Hector Garcia Martin	hgmartin@lbl.gov
Hector Garcia Martin	hgmartin@lbl.gov			1	Strain 52			ACCOAC_2_MDH_1_PTAr_1_CS_0_ACACT1r_0_PPC_2_PPCK_2_PFL_1				Complete	Hector Garcia Martin	hgmartin@lbl.gov
Hector Garcia Martin	hgmartin@lbl.gov			1	Strain 53			ACCOAC_2_MDH_2_PTAr_0_CS_1_ACACT1r_1_PPC_1_PPCK_2_PFL_1				Complete	Hector Garcia Martin	hgmartin@lbl.gov
Hector Garcia Martin	hgmartin@lbl.gov			1	Strain 54			ACCOAC_1_MDH_0_PTAr_1_CS_1_ACACT1r_1_PPC_0_PPCK_2_PFL_2				Complete	Hector Garcia Martin	hgmartin@lbl.gov
Hector Garcia Martin	hgmartin@lbl.gov			1	Strain 55			ACCOAC_0_MDH_1_PTAr_1_CS_2_ACACT1r_2_PPC_0_PPCK_0_PFL_1				Complete	Hector Garcia Martin	hgmartin@lbl.gov
Hector Garcia Martin	hgmartin@lbl.gov			1	Strain 56			ACCOAC_0_MDH_2_PTAr_1_CS_0_ACACT1r_0_PPC_1_PPCK_1_PFL_0				Complete	Hector Garcia Martin	hgmartin@lbl.gov
Hector Garcia Martin	hgmartin@lbl.gov			1	Strain 57			ACCOAC_0_MDH_0_PTAr_0_CS_0_ACACT1r_1_PPC_1_PPCK_0_PFL_1				Complete	Hector Garcia Martin	hgmartin@lbl.gov
Hector Garcia Martin	hgmartin@lbl.gov			1	Strain 58			ACCOAC_1_MDH_2_PTAr_0_CS_1_ACACT1r_2_PPC_0_PPCK_0_PFL_1				Complete	Hector Garcia Martin	hgmartin@lbl.gov
Hector Garcia Martin	hgmartin@lbl.gov			1	Strain 59			ACCOAC_0_MDH_2_PTAr_1_CS_1_ACACT1r_1_PPC_1_PPCK_0_PFL_2				Complete	Hector Garcia Martin	hgmartin@lbl.gov
Hector Garcia Martin	hgmartin@lbl.gov			1	Strain 60			ACCOAC_0_MDH_1_PTAr_0_CS_0_ACACT1r_1_PPC_1_PPCK_0_PFL_1				Complete	Hector Garcia Martin	hgmartin@lbl.gov
Hector Garcia Martin	hgmartin@lbl.gov			1	Strain 61			ACCOAC_1_MDH_0_PTAr_0_CS_0_ACACT1r_2_PPC_2_PPCK_2_PFL_1				Complete	Hector Garcia Martin	hgmartin@lbl.gov
Hector Garcia Martin	hgmartin@lbl.gov			1	Strain 62			ACCOAC_1_MDH_2_PTAr_1_CS_2_ACACT1r_1_PPC_2_PPCK_0_PFL_0				Complete	Hector Garcia Martin	hgmartin@lbl.gov
Hector Garcia Martin	hgmartin@lbl.gov			1	Strain 63			ACCOAC_1_MDH_0_PTAr_1_CS_0_ACACT1r_1_PPC_0_PPCK_2_PFL_1				Complete	Hector Garcia Martin	hgmartin@lbl.gov
Hector Garcia Martin	hgmartin@lbl.gov			1	Strain 64			ACCOAC_1_MDH_2_PTAr_0_CS_0_ACACT1r_2_PPC_2_PPCK_2_PFL_0				Complete	Hector Garcia Martin	hgmartin@lbl.gov
Hector Garcia Martin	hgmartin@lbl.gov			1	Strain 65			ACCOAC_1_MDH_0_PTAr_1_CS_2_ACACT1r_0_PPC_1_PPCK_1_PFL_0				Complete	Hector Garcia Martin	hgmartin@lbl.gov
Hector Garcia Martin	hgmartin@lbl.gov			1	Strain 66			ACCOAC_0_MDH_0_PTAr_2_CS_2_ACACT1r_2_PPC_0_PPCK_1_PFL_1				Complete	Hector Garcia Martin	hgmartin@lbl.gov
Hector Garcia Martin	hgmartin@lbl.gov			1	Strain 67			ACCOAC_2_MDH_2_PTAr_1_CS_1_ACACT1r_1_PPC_1_PPCK_0_PFL_1				Complete	Hector Garcia Martin	hgmartin@lbl.gov
Hector Garcia Martin	hgmartin@lbl.gov			1	Strain 68			ACCOAC_2_MDH_1_PTAr_0_CS_0_ACACT1r_2_PPC_1_PPCK_1_PFL_2				Complete	Hector Garcia Martin	hgmartin@lbl.gov
Hector Garcia Martin	hgmartin@lbl.gov			1	Strain 69			ACCOAC_2_MDH_0_PTAr_1_CS_1_ACACT1r_0_PPC_2_PPCK_2_PFL_0				Complete	Hector Garcia Martin	hgmartin@lbl.gov
Hector Garcia Martin	hgmartin@lbl.gov			1	Strain 70			ACCOAC_0_MDH_2_PTAr_0_CS_1_ACACT1r_1_PPC_1_PPCK_1_PFL_0				Complete	Hector Garcia Martin	hgmartin@lbl.gov
Hector Garcia Martin	hgmartin@lbl.gov			1	Strain 71			ACCOAC_0_MDH_1_PTAr_2_CS_1_ACACT1r_0_PPC_1_PPCK_2_PFL_2				Complete	Hector Garcia Martin	hgmartin@lbl.gov
Hector Garcia Martin	hgmartin@lbl.gov			1	Strain 72			ACCOAC_1_MDH_0_PTAr_2_CS_1_ACACT1r_1_PPC_1_PPCK_2_PFL_0				Complete	Hector Garcia Martin	hgmartin@lbl.gov
Hector Garcia Martin	hgmartin@lbl.gov			1	Strain 73			ACCOAC_2_MDH_2_PTAr_2_CS_2_ACACT1r_1_PPC_0_PPCK_1_PFL_2				Complete	Hector Garcia Martin	hgmartin@lbl.gov
Hector Garcia Martin	hgmartin@lbl.gov			1	Strain 74			ACCOAC_0_MDH_2_PTAr_1_CS_2_ACACT1r_1_PPC_1_PPCK_1_PFL_0				Complete	Hector Garcia Martin	hgmartin@lbl.gov
Hector Garcia Martin	hgmartin@lbl.gov			1	Strain 75			ACCOAC_2_MDH_1_PTAr_2_CS_1_ACACT1r_2_PPC_0_PPCK_2_PFL_2				Complete	Hector Garcia Martin	hgmartin@lbl.gov
Hector Garcia Martin	hgmartin@lbl.gov			1	Strain 76			ACCOAC_1_MDH_0_PTAr_2_CS_1_ACACT1r_2_PPC_0_PPCK_0_PFL_0				Complete	Hector Garcia Martin	hgmartin@lbl.gov
Hector Garcia Martin	hgmartin@lbl.gov			1	Strain 77			ACCOAC_0_MDH_2_PTAr_0_CS_0_ACACT1r_1_PPC_1_PPCK_2_PFL_2				Complete	Hector Garcia Martin	hgmartin@lbl.gov
Hector Garcia Martin	hgmartin@lbl.gov			1	Strain 78			ACCOAC_2_MDH_1_PTAr_0_CS_2_ACACT1r_1_PPC_1_PPCK_1_PFL_2				Complete	Hector Garcia Martin	hgmartin@lbl.gov
Hector Garcia Martin	hgmartin@lbl.gov			1	Strain 79			ACCOAC_2_MDH_1_PTAr_0_CS_0_ACACT1r_0_PPC_0_PPCK_2_PFL_1				Complete	Hector Garcia Martin	hgmartin@lbl.gov
Hector Garcia Martin	hgmartin@lbl.gov			1	Strain 80			ACCOAC_1_MDH_1_PTAr_0_CS_2_ACACT1r_1_PPC_1_PPCK_1_PFL_0				Complete	Hector Garcia Martin	hgmartin@lbl.gov
Hector Garcia Martin	hgmartin@lbl.gov			1	Strain 81			ACCOAC_0_MDH_2_PTAr_0_CS_2_ACACT1r_0_PPC_0_PPCK_0_PFL_0				Complete	Hector Garcia Martin	hgmartin@lbl.gov
Hector Garcia Martin	hgmartin@lbl.gov			1	Strain 82			ACCOAC_1_MDH_2_PTAr_0_CS_2_ACACT1r_0_PPC_0_PPCK_0_PFL_0				Complete	Hector Garcia Martin	hgmartin@lbl.gov
Hector Garcia Martin	hgmartin@lbl.gov			1	Strain 83			ACCOAC_0_MDH_0_PTAr_0_CS_1_ACACT1r_1_PPC_0_PPCK_2_PFL_1				Complete	Hector Garcia Martin	hgmartin@lbl.gov
Hector Garcia Martin	hgmartin@lbl.gov			1	Strain 84			ACCOAC_2_MDH_1_PTAr_2_CS_1_ACACT1r_0_PPC_1_PPCK_2_PFL_2				Complete	Hector Garcia Martin	hgmartin@lbl.gov
Hector Garcia Martin	hgmartin@lbl.gov			1	Strain 85			ACCOAC_2_MDH_0_PTAr_2_CS_1_ACACT1r_2_PPC_1_PPCK_2_PFL_2				Complete	Hector Garcia Martin	hgmartin@lbl.gov
Hector Garcia Martin	hgmartin@lbl.gov			1	Strain 86			ACCOAC_1_MDH_0_PTAr_2_CS_1_ACACT1r_0_PPC_1_PPCK_0_PFL_0				Complete	Hector Garcia Martin	hgmartin@lbl.gov
Hector Garcia Martin	hgmartin@lbl.gov			1	Strain 87			ACCOAC_2_MDH_1_PTAr_2_CS_1_ACACT1r_0_PPC_1_PPCK_0_PFL_1				Complete	Hector Garcia Martin	hgmartin@lbl.gov
Hector Garcia Martin	hgmartin@lbl.gov			1	Strain 88			ACCOAC_1_MDH_0_PTAr_0_CS_0_ACACT1r_0_PPC_2_PPCK_1_PFL_1				Complete	Hector Garcia Martin	hgmartin@lbl.gov
Hector Garcia Martin	hgmartin@lbl.gov			1	Strain 89			ACCOAC_0_MDH_2_PTAr_1_CS_0_ACACT1r_2_PPC_2_PPCK_0_PFL_2				Complete	Hector Garcia Martin	hgmartin@lbl.gov
Hector Garcia Martin	hgmartin@lbl.gov			1	Strain 90			ACCOAC_0_MDH_1_PTAr_1_CS_0_ACACT1r_2_PPC_2_PPCK_1_PFL_2				Complete	Hector Garcia Martin	hgmartin@lbl.gov
Hector Garcia Martin	hgmartin@lbl.gov			1	Strain 91			ACCOAC_2_MDH_0_PTAr_0_CS_2_ACACT1r_0_PPC_2_PPCK_2_PFL_0				Complete	Hector Garcia Martin	hgmartin@lbl.gov
Hector Garcia Martin	hgmartin@lbl.gov			1	Strain 92			ACCOAC_0_MDH_0_PTAr_2_CS_2_ACACT1r_0_PPC_2_PPCK_0_PFL_2				Complete	Hector Garcia Martin	hgmartin@lbl.gov
Hector Garcia Martin	hgmartin@lbl.gov			1	Strain 93			ACCOAC_1_MDH_2_PTAr_0_CS_0_ACACT1r_0_PPC_2_PPCK_2_PFL_0				Complete	Hector Garcia Martin	hgmartin@lbl.gov
Hector Garcia Martin	hgmartin@lbl.gov			1	Strain 94			ACCOAC_0_MDH_2_PTAr_0_CS_1_ACACT1r_0_PPC_2_PPCK_1_PFL_1				Complete	Hector Garcia Martin	hgmartin@lbl.gov
Hector Garcia Martin	hgmartin@lbl.gov			1	Strain 95			ACCOAC_0_MDH_1_PTAr_2_CS_0_ACACT1r_1_PPC_1_PPCK_0_PFL_2				Complete	Hector Garcia Martin	hgmartin@lbl.gov
Hector Garcia Martin	hgmartin@lbl.gov			1	WT			Wild type E. coli				Complete	Hector Garcia Martin	hgmartin@lbl.gov
