# Supplementary material for: Multiomics Data Collection, Visualization, and Utilization for Guiding Metabolic Engineering
Source: Front Bioeng Biotechnol. 2021 Feb 9;9:612893. doi: 10.3389/fbioe.2021.612893 (PMC7902046; doi:10.3389/fbioe.2021.612893)
Supplement: Supplementary file 10 [file Data_Sheet_1.ZIP › Input files/Screencast 6/EDD_experiment_description_file_BE_designs.csv]

Part ID	Line Name	Line Description	Media	Shaking Speed	Starting OD	Culture Volume	Flask Volume	Growth Temperature	Replicate Count
ABFPUB_000215	Strain 1	ACCOAC_1.0_MDH_1.0_PTAr_2.0_CS_0.0_ACACT1r_2.0_PPC_0.0_PPCK_0.0_PFL_0.0	M9	1	0.1	50	200	30	1
ABFPUB_000216	Strain 2	ACCOAC_1.0_MDH_2.0_PTAr_2.0_CS_2.0_ACACT1r_2.0_PPC_1.0_PPCK_1.0_PFL_0.0	M9	1	0.1	50	200	30	1
ABFPUB_000217	Strain 3	ACCOAC_1.0_MDH_0.0_PTAr_0.0_CS_2.0_ACACT1r_1.0_PPC_1.0_PPCK_2.0_PFL_0.0	M9	1	0.1	50	200	30	1
ABFPUB_000218	Strain 4	ACCOAC_1.0_MDH_1.0_PTAr_1.0_CS_1.0_ACACT1r_2.0_PPC_2.0_PPCK_1.0_PFL_0.0	M9	1	0.1	50	200	30	1
ABFPUB_000219	Strain 5	ACCOAC_2.0_MDH_0.0_PTAr_2.0_CS_1.0_ACACT1r_1.0_PPC_0.0_PPCK_1.0_PFL_1.0	M9	1	0.1	50	200	30	1
ABFPUB_000220	Strain 6	ACCOAC_2.0_MDH_0.0_PTAr_0.0_CS_1.0_ACACT1r_2.0_PPC_0.0_PPCK_1.0_PFL_0.0	M9	1	0.1	50	200	30	1
ABFPUB_000221	Strain 7	ACCOAC_2.0_MDH_1.0_PTAr_2.0_CS_2.0_ACACT1r_2.0_PPC_2.0_PPCK_0.0_PFL_2.0	M9	1	0.1	50	200	30	1
ABFPUB_000222	Strain 8	ACCOAC_1.0_MDH_1.0_PTAr_0.0_CS_1.0_ACACT1r_2.0_PPC_0.0_PPCK_0.0_PFL_0.0	M9	1	0.1	50	200	30	1
ABFPUB_000223	Strain 9	ACCOAC_2.0_MDH_1.0_PTAr_2.0_CS_2.0_ACACT1r_0.0_PPC_0.0_PPCK_0.0_PFL_2.0	M9	1	0.1	50	200	30	1
ABFPUB_000224	Strain 10	ACCOAC_2.0_MDH_2.0_PTAr_2.0_CS_0.0_ACACT1r_1.0_PPC_0.0_PPCK_2.0_PFL_0.0	M9	1	0.1	50	200	30	1
ABFPUB_000225	Strain 11	ACCOAC_0.0_MDH_1.0_PTAr_2.0_CS_1.0_ACACT1r_1.0_PPC_2.0_PPCK_0.0_PFL_0.0	M9	1	0.1	50	200	30	1
ABFPUB_000226	Strain 12	ACCOAC_1.0_MDH_2.0_PTAr_1.0_CS_0.0_ACACT1r_2.0_PPC_2.0_PPCK_2.0_PFL_1.0	M9	1	0.1	50	200	30	1
ABFPUB_000227	Strain 13	ACCOAC_1.0_MDH_2.0_PTAr_1.0_CS_2.0_ACACT1r_0.0_PPC_0.0_PPCK_2.0_PFL_2.0	M9	1	0.1	50	200	30	1
ABFPUB_000228	Strain 14	ACCOAC_2.0_MDH_2.0_PTAr_1.0_CS_1.0_ACACT1r_0.0_PPC_2.0_PPCK_2.0_PFL_2.0	M9	1	0.1	50	200	30	1
ABFPUB_000229	Strain 15	ACCOAC_1.0_MDH_1.0_PTAr_2.0_CS_0.0_ACACT1r_2.0_PPC_1.0_PPCK_2.0_PFL_1.0	M9	1	0.1	50	200	30	1
ABFPUB_000230	Strain 16	ACCOAC_1.0_MDH_1.0_PTAr_2.0_CS_0.0_ACACT1r_2.0_PPC_2.0_PPCK_0.0_PFL_0.0	M9	1	0.1	50	200	30	1
ABFPUB_000231	Strain 17	ACCOAC_2.0_MDH_2.0_PTAr_0.0_CS_2.0_ACACT1r_2.0_PPC_2.0_PPCK_0.0_PFL_2.0	M9	1	0.1	50	200	30	1
ABFPUB_000232	Strain 18	ACCOAC_2.0_MDH_2.0_PTAr_1.0_CS_2.0_ACACT1r_0.0_PPC_2.0_PPCK_1.0_PFL_2.0	M9	1	0.1	50	200	30	1
ABFPUB_000233	Strain 19	ACCOAC_2.0_MDH_0.0_PTAr_1.0_CS_0.0_ACACT1r_1.0_PPC_0.0_PPCK_0.0_PFL_1.0	M9	1	0.1	50	200	30	1
ABFPUB_000234	Strain 20	ACCOAC_1.0_MDH_1.0_PTAr_1.0_CS_0.0_ACACT1r_1.0_PPC_2.0_PPCK_2.0_PFL_0.0	M9	1	0.1	50	200	30	1
ABFPUB_000235	Strain 21	ACCOAC_0.0_MDH_2.0_PTAr_1.0_CS_2.0_ACACT1r_0.0_PPC_1.0_PPCK_1.0_PFL_2.0	M9	1	0.1	50	200	30	1
ABFPUB_000236	Strain 22	ACCOAC_2.0_MDH_2.0_PTAr_1.0_CS_1.0_ACACT1r_1.0_PPC_0.0_PPCK_2.0_PFL_1.0	M9	1	0.1	50	200	30	1
ABFPUB_000237	Strain 23	ACCOAC_0.0_MDH_1.0_PTAr_2.0_CS_0.0_ACACT1r_2.0_PPC_1.0_PPCK_1.0_PFL_2.0	M9	1	0.1	50	200	30	1
ABFPUB_000238	Strain 24	ACCOAC_0.0_MDH_0.0_PTAr_0.0_CS_1.0_ACACT1r_2.0_PPC_2.0_PPCK_1.0_PFL_1.0	M9	1	0.1	50	200	30	1
ABFPUB_000239	Strain 25	ACCOAC_0.0_MDH_0.0_PTAr_2.0_CS_2.0_ACACT1r_2.0_PPC_2.0_PPCK_0.0_PFL_2.0	M9	1	0.1	50	200	30	1
ABFPUB_000240	Strain 26	ACCOAC_1.0_MDH_2.0_PTAr_0.0_CS_0.0_ACACT1r_1.0_PPC_2.0_PPCK_0.0_PFL_0.0	M9	1	0.1	50	200	30	1
ABFPUB_000241	Strain 27	ACCOAC_1.0_MDH_1.0_PTAr_1.0_CS_0.0_ACACT1r_0.0_PPC_1.0_PPCK_0.0_PFL_1.0	M9	1	0.1	50	200	30	1
ABFPUB_000242	Strain 28	ACCOAC_0.0_MDH_0.0_PTAr_0.0_CS_0.0_ACACT1r_2.0_PPC_0.0_PPCK_0.0_PFL_0.0	M9	1	0.1	50	200	30	1
ABFPUB_000243	Strain 29	ACCOAC_0.0_MDH_0.0_PTAr_0.0_CS_0.0_ACACT1r_0.0_PPC_0.0_PPCK_2.0_PFL_0.0	M9	1	0.1	50	200	30	1
ABFPUB_000244	Strain 30	ACCOAC_1.0_MDH_0.0_PTAr_0.0_CS_1.0_ACACT1r_2.0_PPC_0.0_PPCK_1.0_PFL_1.0	M9	1	0.1	50	200	30	1
ABFPUB_000245	Strain 31	ACCOAC_0.0_MDH_2.0_PTAr_1.0_CS_0.0_ACACT1r_0.0_PPC_2.0_PPCK_1.0_PFL_1.0	M9	1	0.1	50	200	30	1
ABFPUB_000246	Strain 32	ACCOAC_2.0_MDH_2.0_PTAr_0.0_CS_0.0_ACACT1r_2.0_PPC_2.0_PPCK_0.0_PFL_1.0	M9	1	0.1	50	200	30	1
ABFPUB_000247	Strain 33	ACCOAC_1.0_MDH_0.0_PTAr_0.0_CS_2.0_ACACT1r_0.0_PPC_0.0_PPCK_1.0_PFL_0.0	M9	1	0.1	50	200	30	1
ABFPUB_000248	Strain 34	ACCOAC_0.0_MDH_0.0_PTAr_0.0_CS_2.0_ACACT1r_1.0_PPC_2.0_PPCK_2.0_PFL_2.0	M9	1	0.1	50	200	30	1
ABFPUB_000249	Strain 35	ACCOAC_0.0_MDH_2.0_PTAr_2.0_CS_1.0_ACACT1r_0.0_PPC_1.0_PPCK_1.0_PFL_2.0	M9	1	0.1	50	200	30	1
ABFPUB_000250	Strain 36	ACCOAC_2.0_MDH_0.0_PTAr_1.0_CS_1.0_ACACT1r_1.0_PPC_1.0_PPCK_1.0_PFL_2.0	M9	1	0.1	50	200	30	1
ABFPUB_000251	Strain 37	ACCOAC_2.0_MDH_0.0_PTAr_2.0_CS_0.0_ACACT1r_2.0_PPC_0.0_PPCK_2.0_PFL_2.0	M9	1	0.1	50	200	30	1
ABFPUB_000252	Strain 38	ACCOAC_1.0_MDH_0.0_PTAr_2.0_CS_2.0_ACACT1r_1.0_PPC_2.0_PPCK_2.0_PFL_2.0	M9	1	0.1	50	200	30	1
ABFPUB_000253	Strain 39	ACCOAC_2.0_MDH_0.0_PTAr_2.0_CS_1.0_ACACT1r_1.0_PPC_0.0_PPCK_0.0_PFL_1.0	M9	1	0.1	50	200	30	1
ABFPUB_000254	Strain 40	ACCOAC_2.0_MDH_1.0_PTAr_1.0_CS_2.0_ACACT1r_1.0_PPC_0.0_PPCK_1.0_PFL_1.0	M9	1	0.1	50	200	30	1
ABFPUB_000255	Strain 41	ACCOAC_1.0_MDH_2.0_PTAr_1.0_CS_2.0_ACACT1r_1.0_PPC_1.0_PPCK_1.0_PFL_2.0	M9	1	0.1	50	200	30	1
ABFPUB_000256	Strain 42	ACCOAC_2.0_MDH_1.0_PTAr_2.0_CS_0.0_ACACT1r_0.0_PPC_2.0_PPCK_0.0_PFL_2.0	M9	1	0.1	50	200	30	1
ABFPUB_000257	Strain 43	ACCOAC_0.0_MDH_1.0_PTAr_1.0_CS_1.0_ACACT1r_0.0_PPC_2.0_PPCK_1.0_PFL_2.0	M9	1	0.1	50	200	30	1
ABFPUB_000258	Strain 44	ACCOAC_1.0_MDH_0.0_PTAr_2.0_CS_2.0_ACACT1r_0.0_PPC_0.0_PPCK_2.0_PFL_2.0	M9	1	0.1	50	200	30	1
ABFPUB_000259	Strain 45	ACCOAC_0.0_MDH_1.0_PTAr_0.0_CS_1.0_ACACT1r_1.0_PPC_1.0_PPCK_2.0_PFL_0.0	M9	1	0.1	50	200	30	1
ABFPUB_000260	Strain 46	ACCOAC_2.0_MDH_2.0_PTAr_2.0_CS_2.0_ACACT1r_2.0_PPC_1.0_PPCK_1.0_PFL_1.0	M9	1	0.1	50	200	30	1
ABFPUB_000261	Strain 47	ACCOAC_0.0_MDH_0.0_PTAr_2.0_CS_2.0_ACACT1r_0.0_PPC_0.0_PPCK_1.0_PFL_1.0	M9	1	0.1	50	200	30	1
ABFPUB_000262	Strain 48	ACCOAC_2.0_MDH_1.0_PTAr_1.0_CS_2.0_ACACT1r_1.0_PPC_2.0_PPCK_1.0_PFL_1.0	M9	1	0.1	50	200	30	1
ABFPUB_000263	Strain 49	ACCOAC_1.0_MDH_2.0_PTAr_1.0_CS_2.0_ACACT1r_2.0_PPC_1.0_PPCK_0.0_PFL_1.0	M9	1	0.1	50	200	30	1
ABFPUB_000264	Strain 50	ACCOAC_0.0_MDH_1.0_PTAr_1.0_CS_1.0_ACACT1r_2.0_PPC_0.0_PPCK_1.0_PFL_0.0	M9	1	0.1	50	200	30	1
ABFPUB_000265	Strain 51	ACCOAC_2.0_MDH_1.0_PTAr_2.0_CS_0.0_ACACT1r_0.0_PPC_0.0_PPCK_2.0_PFL_0.0	M9	1	0.1	50	200	30	1
ABFPUB_000266	Strain 52	ACCOAC_2.0_MDH_1.0_PTAr_1.0_CS_0.0_ACACT1r_0.0_PPC_2.0_PPCK_2.0_PFL_1.0	M9	1	0.1	50	200	30	1
ABFPUB_000267	Strain 53	ACCOAC_2.0_MDH_2.0_PTAr_0.0_CS_1.0_ACACT1r_1.0_PPC_1.0_PPCK_2.0_PFL_1.0	M9	1	0.1	50	200	30	1
ABFPUB_000268	Strain 54	ACCOAC_1.0_MDH_0.0_PTAr_1.0_CS_1.0_ACACT1r_1.0_PPC_0.0_PPCK_2.0_PFL_2.0	M9	1	0.1	50	200	30	1
ABFPUB_000269	Strain 55	ACCOAC_0.0_MDH_1.0_PTAr_1.0_CS_2.0_ACACT1r_2.0_PPC_0.0_PPCK_0.0_PFL_1.0	M9	1	0.1	50	200	30	1
ABFPUB_000270	Strain 56	ACCOAC_0.0_MDH_2.0_PTAr_1.0_CS_0.0_ACACT1r_0.0_PPC_1.0_PPCK_1.0_PFL_0.0	M9	1	0.1	50	200	30	1
ABFPUB_000271	Strain 57	ACCOAC_0.0_MDH_0.0_PTAr_0.0_CS_0.0_ACACT1r_1.0_PPC_1.0_PPCK_0.0_PFL_1.0	M9	1	0.1	50	200	30	1
ABFPUB_000272	Strain 58	ACCOAC_1.0_MDH_2.0_PTAr_0.0_CS_1.0_ACACT1r_2.0_PPC_0.0_PPCK_0.0_PFL_1.0	M9	1	0.1	50	200	30	1
ABFPUB_000273	Strain 59	ACCOAC_0.0_MDH_2.0_PTAr_1.0_CS_1.0_ACACT1r_1.0_PPC_1.0_PPCK_0.0_PFL_2.0	M9	1	0.1	50	200	30	1
ABFPUB_000274	Strain 60	ACCOAC_0.0_MDH_1.0_PTAr_0.0_CS_0.0_ACACT1r_1.0_PPC_1.0_PPCK_0.0_PFL_1.0	M9	1	0.1	50	200	30	1
ABFPUB_000275	Strain 61	ACCOAC_1.0_MDH_0.0_PTAr_0.0_CS_0.0_ACACT1r_2.0_PPC_2.0_PPCK_2.0_PFL_1.0	M9	1	0.1	50	200	30	1
ABFPUB_000276	Strain 62	ACCOAC_1.0_MDH_2.0_PTAr_1.0_CS_2.0_ACACT1r_1.0_PPC_2.0_PPCK_0.0_PFL_0.0	M9	1	0.1	50	200	30	1
ABFPUB_000277	Strain 63	ACCOAC_1.0_MDH_0.0_PTAr_1.0_CS_0.0_ACACT1r_1.0_PPC_0.0_PPCK_2.0_PFL_1.0	M9	1	0.1	50	200	30	1
ABFPUB_000278	Strain 64	ACCOAC_1.0_MDH_2.0_PTAr_0.0_CS_0.0_ACACT1r_2.0_PPC_2.0_PPCK_2.0_PFL_0.0	M9	1	0.1	50	200	30	1
ABFPUB_000279	Strain 65	ACCOAC_1.0_MDH_0.0_PTAr_1.0_CS_2.0_ACACT1r_0.0_PPC_1.0_PPCK_1.0_PFL_0.0	M9	1	0.1	50	200	30	1
ABFPUB_000280	Strain 66	ACCOAC_0.0_MDH_0.0_PTAr_2.0_CS_2.0_ACACT1r_2.0_PPC_0.0_PPCK_1.0_PFL_1.0	M9	1	0.1	50	200	30	1
ABFPUB_000281	Strain 67	ACCOAC_2.0_MDH_2.0_PTAr_1.0_CS_1.0_ACACT1r_1.0_PPC_1.0_PPCK_0.0_PFL_1.0	M9	1	0.1	50	200	30	1
ABFPUB_000282	Strain 68	ACCOAC_2.0_MDH_1.0_PTAr_0.0_CS_0.0_ACACT1r_2.0_PPC_1.0_PPCK_1.0_PFL_2.0	M9	1	0.1	50	200	30	1
ABFPUB_000283	Strain 69	ACCOAC_2.0_MDH_0.0_PTAr_1.0_CS_1.0_ACACT1r_0.0_PPC_2.0_PPCK_2.0_PFL_0.0	M9	1	0.1	50	200	30	1
ABFPUB_000284	Strain 70	ACCOAC_0.0_MDH_2.0_PTAr_0.0_CS_1.0_ACACT1r_1.0_PPC_1.0_PPCK_1.0_PFL_0.0	M9	1	0.1	50	200	30	1
ABFPUB_000285	Strain 71	ACCOAC_0.0_MDH_1.0_PTAr_2.0_CS_1.0_ACACT1r_0.0_PPC_1.0_PPCK_2.0_PFL_2.0	M9	1	0.1	50	200	30	1
ABFPUB_000286	Strain 72	ACCOAC_1.0_MDH_0.0_PTAr_2.0_CS_1.0_ACACT1r_1.0_PPC_1.0_PPCK_2.0_PFL_0.0	M9	1	0.1	50	200	30	1
ABFPUB_000287	Strain 73	ACCOAC_2.0_MDH_2.0_PTAr_2.0_CS_2.0_ACACT1r_1.0_PPC_0.0_PPCK_1.0_PFL_2.0	M9	1	0.1	50	200	30	1
ABFPUB_000288	Strain 74	ACCOAC_0.0_MDH_2.0_PTAr_1.0_CS_2.0_ACACT1r_1.0_PPC_1.0_PPCK_1.0_PFL_0.0	M9	1	0.1	50	200	30	1
ABFPUB_000289	Strain 75	ACCOAC_2.0_MDH_1.0_PTAr_2.0_CS_1.0_ACACT1r_2.0_PPC_0.0_PPCK_2.0_PFL_2.0	M9	1	0.1	50	200	30	1
ABFPUB_000290	Strain 76	ACCOAC_1.0_MDH_0.0_PTAr_2.0_CS_1.0_ACACT1r_2.0_PPC_0.0_PPCK_0.0_PFL_0.0	M9	1	0.1	50	200	30	1
ABFPUB_000291	Strain 77	ACCOAC_0.0_MDH_2.0_PTAr_0.0_CS_0.0_ACACT1r_1.0_PPC_1.0_PPCK_2.0_PFL_2.0	M9	1	0.1	50	200	30	1
ABFPUB_000292	Strain 78	ACCOAC_2.0_MDH_1.0_PTAr_0.0_CS_2.0_ACACT1r_1.0_PPC_1.0_PPCK_1.0_PFL_2.0	M9	1	0.1	50	200	30	1
ABFPUB_000293	Strain 79	ACCOAC_2.0_MDH_1.0_PTAr_0.0_CS_0.0_ACACT1r_0.0_PPC_0.0_PPCK_2.0_PFL_1.0	M9	1	0.1	50	200	30	1
ABFPUB_000294	Strain 80	ACCOAC_1.0_MDH_1.0_PTAr_0.0_CS_2.0_ACACT1r_1.0_PPC_1.0_PPCK_1.0_PFL_0.0	M9	1	0.1	50	200	30	1
ABFPUB_000295	Strain 81	ACCOAC_0.0_MDH_2.0_PTAr_0.0_CS_2.0_ACACT1r_0.0_PPC_0.0_PPCK_0.0_PFL_0.0	M9	1	0.1	50	200	30	1
ABFPUB_000296	Strain 82	ACCOAC_1.0_MDH_2.0_PTAr_0.0_CS_2.0_ACACT1r_0.0_PPC_0.0_PPCK_0.0_PFL_0.0	M9	1	0.1	50	200	30	1
ABFPUB_000297	Strain 83	ACCOAC_0.0_MDH_0.0_PTAr_0.0_CS_1.0_ACACT1r_1.0_PPC_0.0_PPCK_2.0_PFL_1.0	M9	1	0.1	50	200	30	1
ABFPUB_000298	Strain 84	ACCOAC_2.0_MDH_1.0_PTAr_2.0_CS_1.0_ACACT1r_0.0_PPC_1.0_PPCK_2.0_PFL_2.0	M9	1	0.1	50	200	30	1
ABFPUB_000299	Strain 85	ACCOAC_2.0_MDH_0.0_PTAr_2.0_CS_1.0_ACACT1r_2.0_PPC_1.0_PPCK_2.0_PFL_2.0	M9	1	0.1	50	200	30	1
ABFPUB_000300	Strain 86	ACCOAC_1.0_MDH_0.0_PTAr_2.0_CS_1.0_ACACT1r_0.0_PPC_1.0_PPCK_0.0_PFL_0.0	M9	1	0.1	50	200	30	1
ABFPUB_000301	Strain 87	ACCOAC_2.0_MDH_1.0_PTAr_2.0_CS_1.0_ACACT1r_0.0_PPC_1.0_PPCK_0.0_PFL_1.0	M9	1	0.1	50	200	30	1
ABFPUB_000302	Strain 88	ACCOAC_1.0_MDH_0.0_PTAr_0.0_CS_0.0_ACACT1r_0.0_PPC_2.0_PPCK_1.0_PFL_1.0	M9	1	0.1	50	200	30	1
ABFPUB_000303	Strain 89	ACCOAC_0.0_MDH_2.0_PTAr_1.0_CS_0.0_ACACT1r_2.0_PPC_2.0_PPCK_0.0_PFL_2.0	M9	1	0.1	50	200	30	1
ABFPUB_000304	Strain 90	ACCOAC_0.0_MDH_1.0_PTAr_1.0_CS_0.0_ACACT1r_2.0_PPC_2.0_PPCK_1.0_PFL_2.0	M9	1	0.1	50	200	30	1
ABFPUB_000305	Strain 91	ACCOAC_2.0_MDH_0.0_PTAr_0.0_CS_2.0_ACACT1r_0.0_PPC_2.0_PPCK_2.0_PFL_0.0	M9	1	0.1	50	200	30	1
ABFPUB_000306	Strain 92	ACCOAC_0.0_MDH_0.0_PTAr_2.0_CS_2.0_ACACT1r_0.0_PPC_2.0_PPCK_0.0_PFL_2.0	M9	1	0.1	50	200	30	1
ABFPUB_000307	Strain 93	ACCOAC_1.0_MDH_2.0_PTAr_0.0_CS_0.0_ACACT1r_0.0_PPC_2.0_PPCK_2.0_PFL_0.0	M9	1	0.1	50	200	30	1
ABFPUB_000308	Strain 94	ACCOAC_0.0_MDH_2.0_PTAr_0.0_CS_1.0_ACACT1r_0.0_PPC_2.0_PPCK_1.0_PFL_1.0	M9	1	0.1	50	200	30	1
ABFPUB_000309	Strain 95	ACCOAC_0.0_MDH_1.0_PTAr_2.0_CS_0.0_ACACT1r_1.0_PPC_1.0_PPCK_0.0_PFL_2.0	M9	1	0.1	50	200	30	1
ABFPUB_000310	WT	Wild type E. coli	M9	1	0.1	50	200	30	1
