# Supplementary material for: Multiomics Data Collection, Visualization, and Utilization for Guiding Metabolic Engineering
Source: Front Bioeng Biotechnol. 2021 Feb 9;9:612893. doi: 10.3389/fbioe.2021.612893 (PMC7902046; doi:10.3389/fbioe.2021.612893)
Supplement: Supplementary file 10 [file Data_Sheet_1.ZIP › Input files/Screencast 6/EDD_isoprenol_production.csv]

Line Name	Measurement Type	Value	Time	Units
Strain 1	CID:12988	0.0	9.0	mM
Strain 2	CID:12988	0.5521006566981328	9.0	mM
Strain 3	CID:12988	0.3491964628655708	9.0	mM
Strain 4	CID:12988	0.551849089642285	9.0	mM
Strain 5	CID:12988	0.0801168354764624	9.0	mM
Strain 6	CID:12988	0.0786466294538431	9.0	mM
Strain 7	CID:12988	0.5726483723065023	9.0	mM
Strain 8	CID:12988	0.11189822394885013	9.0	mM
Strain 9	CID:12988	0.0	9.0	mM
Strain 10	CID:12988	0.0	9.0	mM
Strain 11	CID:12988	0.0	9.0	mM
Strain 12	CID:12988	0.0	9.0	mM
Strain 13	CID:12988	0.0	9.0	mM
Strain 14	CID:12988	0.0	9.0	mM
Strain 15	CID:12988	0.0	9.0	mM
Strain 16	CID:12988	0.0	9.0	mM
Strain 17	CID:12988	0.49509660990603654	9.0	mM
Strain 18	CID:12988	0.0	9.0	mM
Strain 19	CID:12988	0.0	9.0	mM
Strain 20	CID:12988	0.0	9.0	mM
Strain 21	CID:12988	0.0	9.0	mM
Strain 22	CID:12988	0.10776788931727366	9.0	mM
Strain 23	CID:12988	0.0	9.0	mM
Strain 24	CID:12988	0.0	9.0	mM
Strain 25	CID:12988	0.0	9.0	mM
Strain 26	CID:12988	0.0	9.0	mM
Strain 27	CID:12988	0.0	9.0	mM
Strain 28	CID:12988	0.0	9.0	mM
Strain 29	CID:12988	0.0	9.0	mM
Strain 30	CID:12988	0.08715286904560315	9.0	mM
Strain 31	CID:12988	0.0	9.0	mM
Strain 32	CID:12988	0.0	9.0	mM
Strain 33	CID:12988	0.0	9.0	mM
Strain 34	CID:12988	0.0	9.0	mM
Strain 35	CID:12988	0.0	9.0	mM
Strain 36	CID:12988	0.3480226500750092	9.0	mM
Strain 37	CID:12988	0.0	9.0	mM
Strain 38	CID:12988	0.3657487264150976	9.0	mM
Strain 39	CID:12988	0.0801168354764624	9.0	mM
Strain 40	CID:12988	0.1077680721827784	9.0	mM
Strain 41	CID:12988	0.5726483723064942	9.0	mM
Strain 42	CID:12988	0.0	9.0	mM
Strain 43	CID:12988	0.0	9.0	mM
Strain 44	CID:12988	0.0	9.0	mM
Strain 45	CID:12988	0.0	9.0	mM
Strain 46	CID:12988	0.5726483723064975	9.0	mM
Strain 47	CID:12988	0.0	9.0	mM
Strain 48	CID:12988	0.572648372306493	9.0	mM
Strain 49	CID:12988	0.572648372306499	9.0	mM
Strain 50	CID:12988	0.0	9.0	mM
Strain 51	CID:12988	0.0	9.0	mM
Strain 52	CID:12988	0.0	9.0	mM
Strain 53	CID:12988	0.4562556964349428	9.0	mM
Strain 54	CID:12988	0.08441386879962273	9.0	mM
Strain 55	CID:12988	0.0	9.0	mM
Strain 56	CID:12988	0.0	9.0	mM
Strain 57	CID:12988	0.0	9.0	mM
Strain 58	CID:12988	0.11346228071574721	9.0	mM
Strain 59	CID:12988	0.0	9.0	mM
Strain 60	CID:12988	0.0	9.0	mM
Strain 61	CID:12988	0.0	9.0	mM
Strain 62	CID:12988	0.5527341150741544	9.0	mM
Strain 63	CID:12988	0.0	9.0	mM
Strain 64	CID:12988	0.0	9.0	mM
Strain 65	CID:12988	0.0	9.0	mM
Strain 66	CID:12988	0.0	9.0	mM
Strain 67	CID:12988	0.572648372306498	9.0	mM
Strain 68	CID:12988	0.0	9.0	mM
Strain 69	CID:12988	0.0	9.0	mM
Strain 70	CID:12988	0.0	9.0	mM
Strain 71	CID:12988	0.0	9.0	mM
Strain 72	CID:12988	0.36721037621195696	9.0	mM
Strain 73	CID:12988	0.10980721198125182	9.0	mM
Strain 74	CID:12988	0.0	9.0	mM
Strain 75	CID:12988	0.10980718505180409	9.0	mM
Strain 76	CID:12988	0.08573335475249501	9.0	mM
Strain 77	CID:12988	0.0	9.0	mM
Strain 78	CID:12988	0.4529176751570443	9.0	mM
Strain 79	CID:12988	0.0	9.0	mM
Strain 80	CID:12988	0.4964245287395541	9.0	mM
Strain 81	CID:12988	0.0	9.0	mM
Strain 82	CID:12988	0.0	9.0	mM
Strain 83	CID:12988	0.0	9.0	mM
Strain 84	CID:12988	0.0	9.0	mM
Strain 85	CID:12988	0.4134093536602075	9.0	mM
Strain 86	CID:12988	0.0	9.0	mM
Strain 87	CID:12988	0.0	9.0	mM
Strain 88	CID:12988	0.0	9.0	mM
Strain 89	CID:12988	0.0	9.0	mM
Strain 90	CID:12988	0.0	9.0	mM
Strain 91	CID:12988	0.0	9.0	mM
Strain 92	CID:12988	0.0	9.0	mM
Strain 93	CID:12988	0.0	9.0	mM
Strain 94	CID:12988	0.0	9.0	mM
Strain 95	CID:12988	0.0	9.0	mM
WT	CID:12988	0.46188000887094716	9.0	mM
